1 Title: Occurrence and distribution of fecal indicators and pathogenic bacteria in seawater and *Perna*  
2 *perna* mussel in the Gulf of Annaba (Southern Mediterranean)

3  
4 Mouna Boufafa<sup>1\*</sup>, Skander Kadri<sup>1</sup>, Peter Redder<sup>2\*</sup> and Mourad Bensouilah<sup>1</sup>

5  
6 <sup>1</sup>Laboratory of Eco-biology for Marine Environment and Coastlines, Faculty of science, Badji  
7 Moukhtar University, BP 12 Annaba 23000, Algeria

8 <sup>2</sup>LMGM, CBI, Paul Sabatier University, 118 Route de Narbonne, 31062 Toulouse, France

9  
10 \*Corresponding authors:

11 Mouna Boufafa; email: [mouna\\_boufafa@yahoo.fr](mailto:mouna_boufafa@yahoo.fr); telephone number: (+213)773619955

12 Peter Redder; email: [peter.redder@univ-tlse3.fr](mailto:peter.redder@univ-tlse3.fr); telephone number: (+33)561335981

13  
14 **Abstract**

15 The brown mussel *Perna perna* is a marine bivalve that is widely distributed and consumed along the  
16 east coast of Algeria. Due to its filter-feeding capacity, this mollusk can accumulate large quantities of  
17 pathogenic microorganisms from the surrounding waters, thus acting as bio-indicator of coastal  
18 environments. The objective of this study is to investigate the occurrence and distribution of fecal  
19 indicators and pathogenic bacteria in seawaters and mussels collected from four different sites in the  
20 Gulf of Annaba through physicochemical, biochemical and molecular analysis. The obtained results  
21 revealed that the levels of fecal indicator bacteria (FIB) were alarmingly high at Sidi Salem and Rezgui  
22 Rachid when compared with the two other sites ( $p < 0.05$ ) and largely exceeded the permissible limits.  
23 Besides, *P. perna* collected from all sites were several fold more contaminated by these germs than  
24 seawater samples, notably, during the warm season of the study period. Biochemical and molecular  
25 analysis showed that isolated bacteria from both environmental compartments were mostly potentially  
26 pathogenic species such as *E. coli*, Salmonella, Staphylococcus, Klebsiella, Pseudomonas and Proteus.  
27 These principal findings demonstrate the strong involvement of anthropogenic activities on the  
28 microbiological quality of the Gulf and highlight the role of *P. perna* as an effective bio-indicator of the  
29 bacteriological quality of coastal waters.

30 **Keywords:** Bacterial contamination; Mediterranean coastal waters; Gulf of Annaba; Fecal indicators;  
31 *Perna perna*

32

## 33 Introduction

34 For many decades, the coastal marine ecosystems have been continuously threatened by several  
35 anthropogenic activities such as improper sewage disposal, urban runoff and massive discharges of  
36 agricultural and industrial effluents (Ghozzi et al. 2017; Damak et al. 2020). Coastal waters are often the  
37 receiving environment for all kinds of wastewater discharges containing many microorganisms that are  
38 harmful to human health, especially in bathing beaches and shellfish production areas (Perkins et al.  
39 2014). Thus, the impact on health is more than worrying, placing microbiological pollution as a major  
40 public health problem.

41 Due to their sessile life-style, resistance to environmental stressors and efficient filtration ability,  
42 bivalves, especially mussels, have been widely used as bio-indicators of coastal pollution (Belabed et al.  
43 2013; Jia et al. 2018; Ozkan et al. 2017). These invertebrates have the potential to accumulate large  
44 quantities of microorganisms from their surrounding waters, including opportunistic bacteria  
45 (*Aeromonas*, *Vibrio*, *Pseudomonas*), protozoan parasites (*Cryptosporidium*, *Giardia*), viruses  
46 (adenoviruses, hepatoviruses) as well as pathogenic bacteria (*E. coli*, *Salmonella*) (Ghozzi et al. 2017).  
47 They may therefore jeopardize human health, especially when they are consumed as seafood (Stabili et  
48 al. 2005; Zannella et al. 2017, Vincy et al. 2017). Numerous studies have reported that many serious  
49 illnesses such as acute gastroenteritis and hepatitis E virus infections are related to the presence of  
50 pathogenic microorganisms in bivalves mollusks, especially when they are eaten raw or undercooked  
51 (Le Guyader et al. 2006; O'Hara et al. 2018; Kobayashi et al. 2019; Fouillet et al. 2020). Hence, there is  
52 an urgent need for an overall assessment to predict the presence of these infectious agents related to  
53 waterborne outbreaks, and to prevent the impacts of fecal contamination on human and environmental  
54 health. The Gulf of Annaba is one of the most valuable coastal regions of Northern Algeria, because of  
55 its great touristic and economic importance. However, it is highly vulnerable to several types of  
56 pollutants, primarily related to the intensive agricultural and industrial discharges and the presence of  
57 domestic wastes, especially on the outskirts of the city where a high number of population is  
58 concentrated (Soltani et al. 2012; Amri et al. 2017; Ouali et al. 2018). These anthropogenic sources are  
59 further exacerbated by diverse natural environmental contaminants such as terrestrial effluents  
60 especially in rainy weather, animal excreta, freshwater and river discharges, and the problem of global  
61 climate change. Despite this increasing pressure, the problem of fecal contamination, and the potential  
62 health hazards it can cause have been little studied in the Gulf of Annaba (Kadri et al. 2015, 2017).  
63 Therefore, this study aimed (1) to evaluate the occurrence and the distribution of fecal indicators and  
64 pathogenic bacteria in seawater and the mussel *Perna perna* samples by implementing a spatial-temporal  
65 sampling strategy (2) to assess the impact of physicochemical variables on the abundance of fecal

66 indicator bacteria (FIB) (3) to determine the origin of microorganism's inputs and hot spots of heavy  
67 contamination.

## 68 **Materials and methods**

### 69 **Sampling area**

70 The Gulf of Annaba in Northeastern Algeria, stretching ~40 km from Cap de Garde (36°96'N, 7°79'E)  
71 in the West to Cap Rosa (36°68'N, 8°25'E) in the East, is a heavily polluted ecosystem, due to a variety  
72 of agricultural, industrial and urban discharges, in addition to massive domestic wastes from a large part  
73 of the city of Annaba (Abdenmour et al. 2000). Four sampling sites were strategically selected for the  
74 present study, based on different potential pollution sources in these areas: S1 'Cap de Garde' (36°96'N,  
75 7°79'E); S2 'Rezgui Rachid' (36°91'N, 7°76'E); S3 'Sidi Salem' (36°86'N, 7°76'E); and S4 'Lahnaya'  
76 (36°93'N, 8°20'E) (Fig. 1).

77

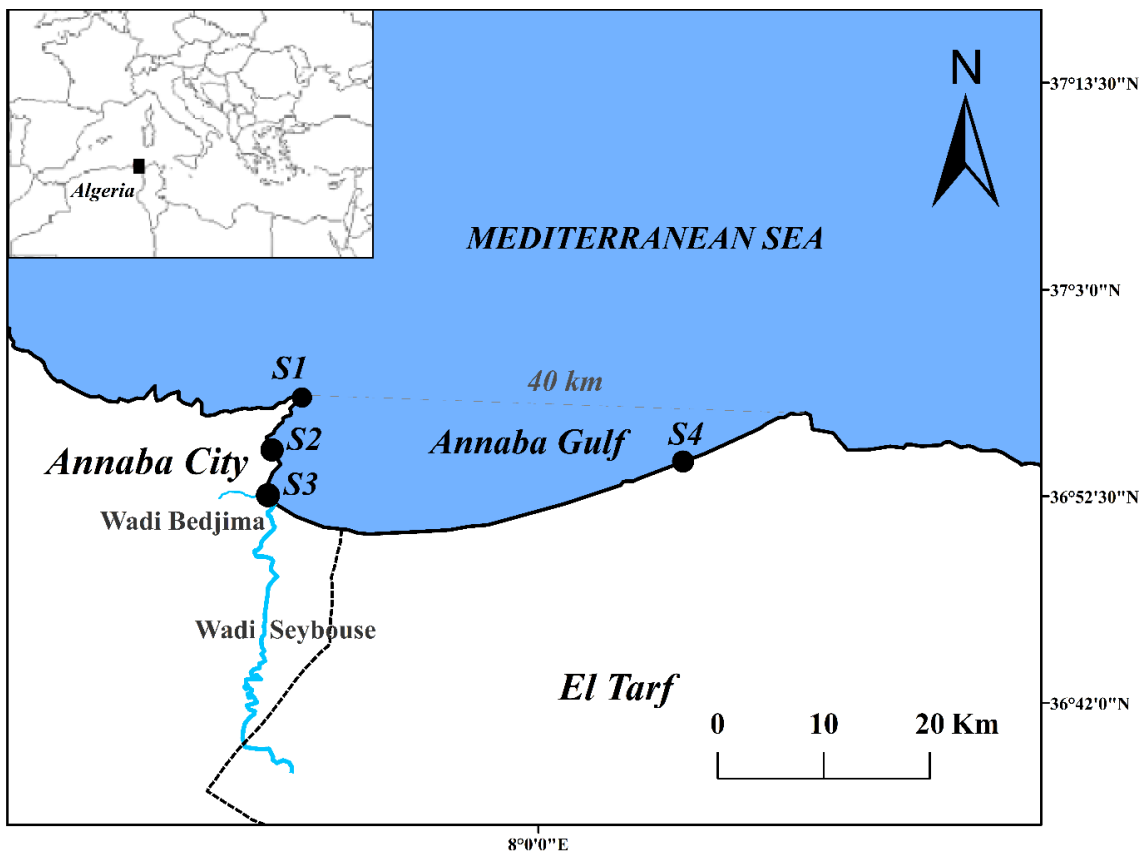

78

79 **Fig. 1** Map showing the location of the Gulf of Annaba and sampling sites

80 The location of the larger map is shown by a black rectangle on the insert map. The four sampling sites  
81 (S1 to S4) are indicated with black circles, S1: Cap de Garde, S2: Rezgui Rachid, S3: Sidi Salem, S4:  
82 Lahnaya.

83

## 84 **Sampling protocol**

85 Samples of seawater and *Perna perna* mussels were monthly and simultaneously collected at each site,  
86 in the period from January to December 2018. Water samples were obtained at a depth of 30-50 cm  
87 below the surface of the water to avoid sunlight exposure using 250 ml sterile glass bottles. *P. perna*  
88 mussels were harvested by hand near to the water collecting points at a rate of 10-20 individuals  
89 (depending on size). All samples were immediately placed in a clean cooler containing ice cubes (4°C)  
90 and transported to the laboratory within the following 2-4h. At each site and each month, seawater  
91 environmental variables including temperature (T), pH, salinity (Sal), dissolved oxygen (DO) were  
92 measured *in situ* using a multi-parameter probe (Multi 340i/SET-82362, WTW®, Germany). The  
93 determination of seawater suspended solids (SS) was performed as described by Aminot and  
94 Chaussepied (1983).

## 95 **Bacteriological analysis**

96 Once in the laboratory, the mussels were washed and opened aseptically. Then, the tissue and  
97 intravalvular liquid (25 g) were mixed and homogenized with 225ml sterile physiological water in a  
98 sterile laboratory blender (standard NF EN ISO 6887). For seawater samples, a volume of 100 ml was  
99 directly analysed without any treatment (Rodier et al. 2009). The levels of FIB such as total coliforms  
100 (TC), *Escherichia coli* (EC) as well as fecal streptococci (FS) were estimated by a three-tube decimal  
101 dilution using the most probable number (MPN) method (standard NF V 08-021 (1993) / ISO 7402 and  
102 NF V 08-020 (1994) / ISO 7251). All results were statistically expressed as MPN per 100 ml of the  
103 sample according to the Mac Grady's tables (Rodier et al. 2009). As for the isolation of potentially  
104 pathogenic bacteria, standard microbial methods were carried out (Rodier et al. 2009). Bacterial isolates  
105 were biochemically identified at the species level through Analytical Profile Index (API 20E, API20NE,  
106 API Staph) and further confirmed by 16S rRNA gene sequencing, Multi Locus Sequence Typing  
107 (MLST), and phylogenetic analysis.

## 108 **DNA extraction and 16S rRNA gene amplification**

109 All primers used in this study are listed in Table 1. For cells disruption and DNA extraction from 25  
110 selected isolates, bacterial colonies were picked from pure overnight LB (Luria Bertani) agar plates and  
111 transferred into 1.5 ml Eppendorf tubes containing 50 µl of 1xTE buffer (10 mM Tris-HCl pH 8, 1 mM  
112 EDTA) supplemented with approximately 100 mg of 0.1 mm Zirconia beads. The tubes were incubated  
113 at 37°C for 15 minutes and then strongly vortexed for 3 min to disrupt the cells. The resulting bacterial  
114 lysate served as a template for the 16S rRNA gene amplification. The 25 µl PCR mixture contained 0.5  
115 µl DNA template, 2.5 µl Dream Taq buffer (10x), 1.5 µl dNTPs (2.5 mM each), 0.5µl Dream Taq DNA  
116 polymerase (Thermo Scientific™) and 1.5 µl 10 µM of each universal primers 27F and 1492R. PCR  
117 cycling conditions were maintained as previously described by da Silva et al. (2013). Amplification

118 products were visualized by electrophoresis on 1% agarose gel in 1x TBE buffer after staining with  
119 SYBR Safe (Invitrogen) and subsequently purified with Gene Jet Gel Extraction Kit (Thermo Scientific  
120 <sup>TM</sup>).

### 121 **DNA sequence analysis**

122 The PCR-amplified regions of the 16S rRNA genes were Sanger sequenced using primer 27F (Table 1).  
123 The obtained partial sequences of the 16S rRNA gene were first analysed and assembled using BioEdit  
124 version 7.2.5 (Hall 1999), and then compared with the GenBank NCBI database through BLAST  
125 software to confirm the species of the isolates. After that, a multiple sequence alignment was carried out  
126 using Clustal X software integrated into MEGA 7 program (Kumar et al. 2016). Finally, the phylogenetic  
127 tree was constructed by the neighbor-joining method with 1,000 bootstrap replications.

### 128 **Multilocus Sequence Typing analysis (MLST analysis)**

129 Five isolates (EM3, EM18, EM97, EM102, and MM6) isolated from *P. perna*, were chosen based on  
130 their same site of isolation (Sidi Salem) and sampling date (15 January 2018) for further characterization  
131 by Multi-locus sequence typing (MLST). DNA from all isolates were subjected to PCR amplification  
132 targeting seven specific genes (*trpA*, *trpB*, *dinB*, *polB*, *putP*, *pabB* and *icdA*) using suitable primers  
133 (Table 1), and following the same procedures as used for 16S rRNA genes. The amplification program  
134 was carried out as follow: initial denaturation of 4 min at 94°C, followed by 30 cycles of 30s at 94°C,  
135 30s at 52°C and 2 min at 72°C, and a final extension at 72°C for 4 min. The phylogenetic tree is based  
136 on 2758 bp concatenated partial sequences of the seven genes from EM3, EM18, EM97, EM102, and  
137 MM6 as well as the equivalent loci in closely related strain. The sequences were aligned with Clustal  
138 Omega with default settings on the EBI server and the guide-tree was visualized using iTOL (Letunic  
139 and Bork, 2019; Madeira et al. 2019).

### 140 **Statistical analysis**

141 Statistical analysis was accomplished under R software version 3.1.2. First, the Spearman correlation  
142 coefficient was evaluated to investigate possible relationships between our data sets. Then, the Kruskal-  
143 Wallis test was applied to assess the inter- sites and inter-months comparisons. Finally, Principal  
144 Component Analysis (PCA) was used as a descriptive method to characterize the structure of the four  
145 sampling sites in the study area and to assess the contribution of measured environmental variables on  
146 the abundance of the fecal indicators employing the FactoMineR package. In all tests, the significance  
147 level was set to p-value < 0.05.

148

## 149 **Results**

### 150 **Physicochemical analysis of sampled water**

151 The monthly variation in seawater environmental variables obtained throughout the sampling period are  
152 presented in Fig. 2. As expected, the annual temperature and salinity cycles showed similar seasonal  
153 fluctuations across the four study sites. Seawater temperature ranged from 10.3°C at S4 in February to  
154 28.6°C at S2 in August, while salinity varied from 34.9 g/L at S3 in March to 41.6 g/L at S2 in August.  
155 The variations of these two parameters are primarily influenced by the climatic conditions of the area,  
156 the high values recorded at S2 and S3 would be due to the fact that these sites, located in the inner of the  
157 Gulf, are protected from currents and have low freshwater inputs and fairly high evaporation. The pH  
158 remained relatively constant and alkaline during the sampled months, with a slight increase in spring.  
159 Changes in dissolved oxygen were generally opposite to the changes in temperature and salinity. The  
160 highest value (12.6 mg/L) was recorded during the winter at S4, while the lower one (5 mg/L) was  
161 detected during the summer at S3 and S2. Indeed, the application of the Spearman's correlation test led  
162 us to confirm the strong negative and significant correlations between this variable and the temperature  
163 and the salinity ( $r = -0.84$ ,  $p < 0.0001$ ;  $r = -0.65$ ,  $p < 0.0001$  respectively) (Table 3). Levels of suspended  
164 solids were lower at S1 and S4 as compared with the other two sites. The highest value (0.42mg/L) was  
165 recorded two times in February at S3 and in December at S2.

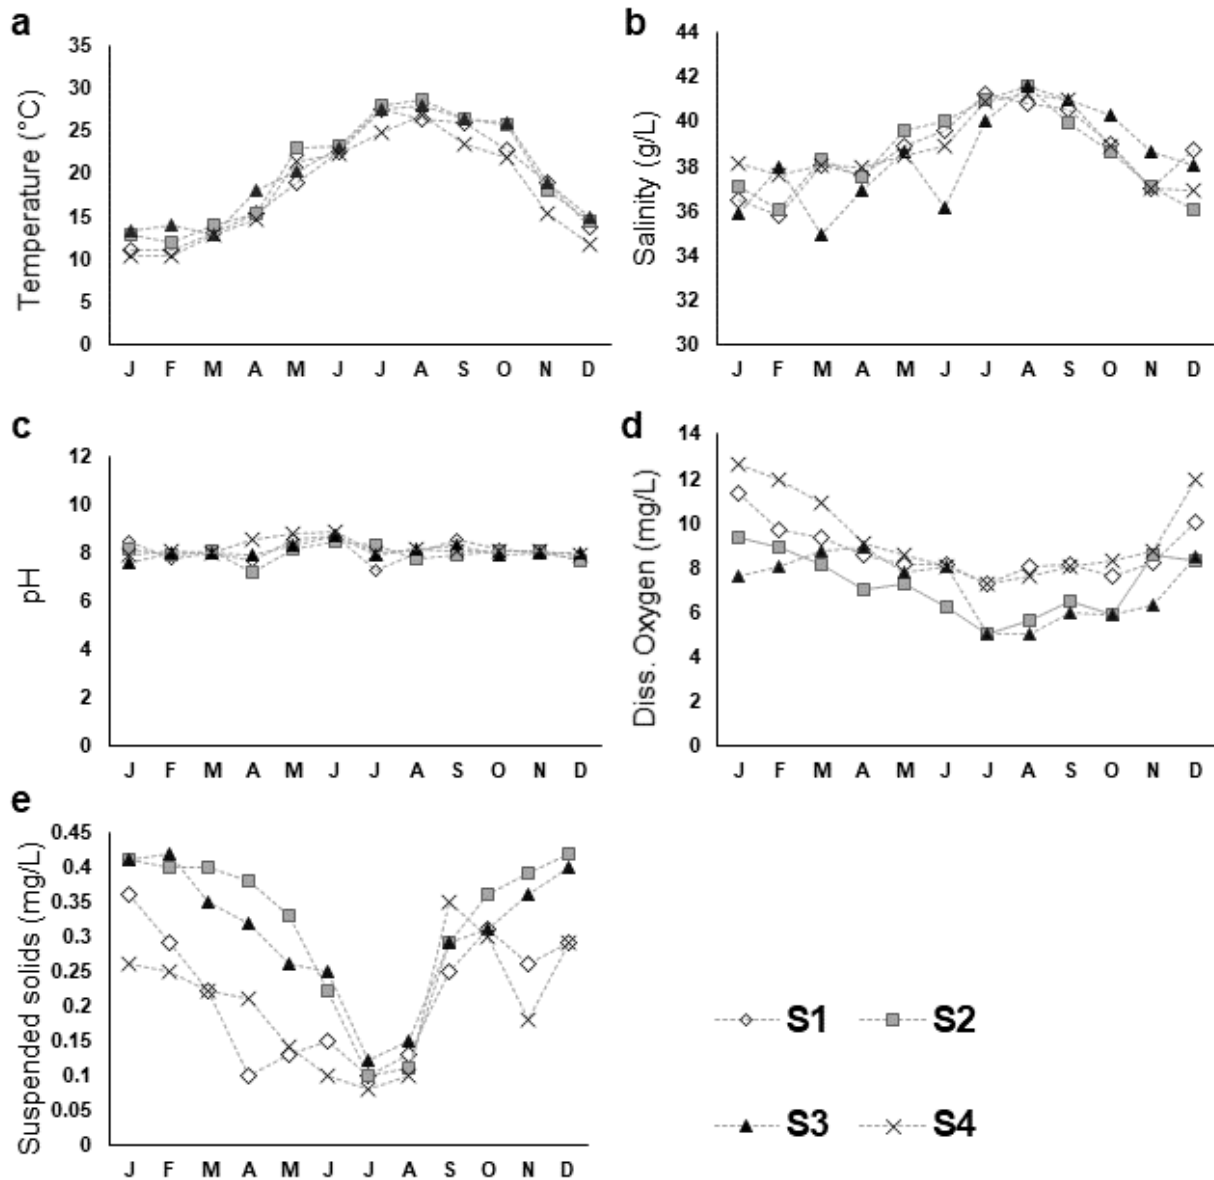

166

167

**Fig. 2** Results of physicochemical analysis of seawater samples at the four sampling sites

168

**a** Temperature (°C), **b** Salinity (g/L), **c** Dissolved Oxygen (mg/L), **d** pH, **e** Suspended Solids (mg/L).

169

S1: Cap de Garde, S2: Rezgui Rachid, S3: Sidi Salem, S4: Lahnaya.

170

171

### Bacteriological analysis of isolated bacteria

172

As shown in Fig. 3, the results of the bacteriological analysis revealed that the fecal contamination varied over time and between the four sampling sites in the Gulf of Annaba ( $p < 0.05$ ). However, the levels of FIB were consistently alarmingly high at S2 and S3, and largely exceeded the limits defined by Algerian law. In addition, *P. perna* mussels from all sites were several fold more contaminated by these germs than the seawater samples, notably, during the warm months of the year. TC concentrations in the mussels ranged from  $9 \times 10^3$  MPN/100 ml in March at S4 to  $3 \times 10^5$  MPN/100mL in June at S3. For

177



178 seawater samples, the maximum levels of TC ( $4.6 \times 10^3$  MPN/100 ml) was registered in S2 and S3 where  
179 more than 500 MPN/100mL were noted in 96% of the samples. Fecal contamination with *E. coli* was  
180 less significant than TC contamination during the sampling period. This may be due to the exclusively  
181 fecal origin of this member of the TC group, which makes it probably one of the best bacterial indicators  
182 of fecal contamination in the aquatic environment. This germ was present in 44% of the seawater  
183 samples at concentrations below 100 MPN/100mL; however, 100% of the *P. perna* samples of S3  
184 showed loads of more than  $4.6 \times 10^4$  MPN/100mL. On the other hand, FS was present throughout the  
185 entire study period. The highest concentration ( $2.5 \times 10^4$  MPN/100ml) was detected in September in the  
186 mussels of S2. Loads of more than 100 MPN/100mL were noted in more than 79% of the seawater  
187 samples of all sites. Based on Spearman's correlation results, these three groups of bacteria were highly  
188 correlated with each other ( $p < 0.0001$ ).



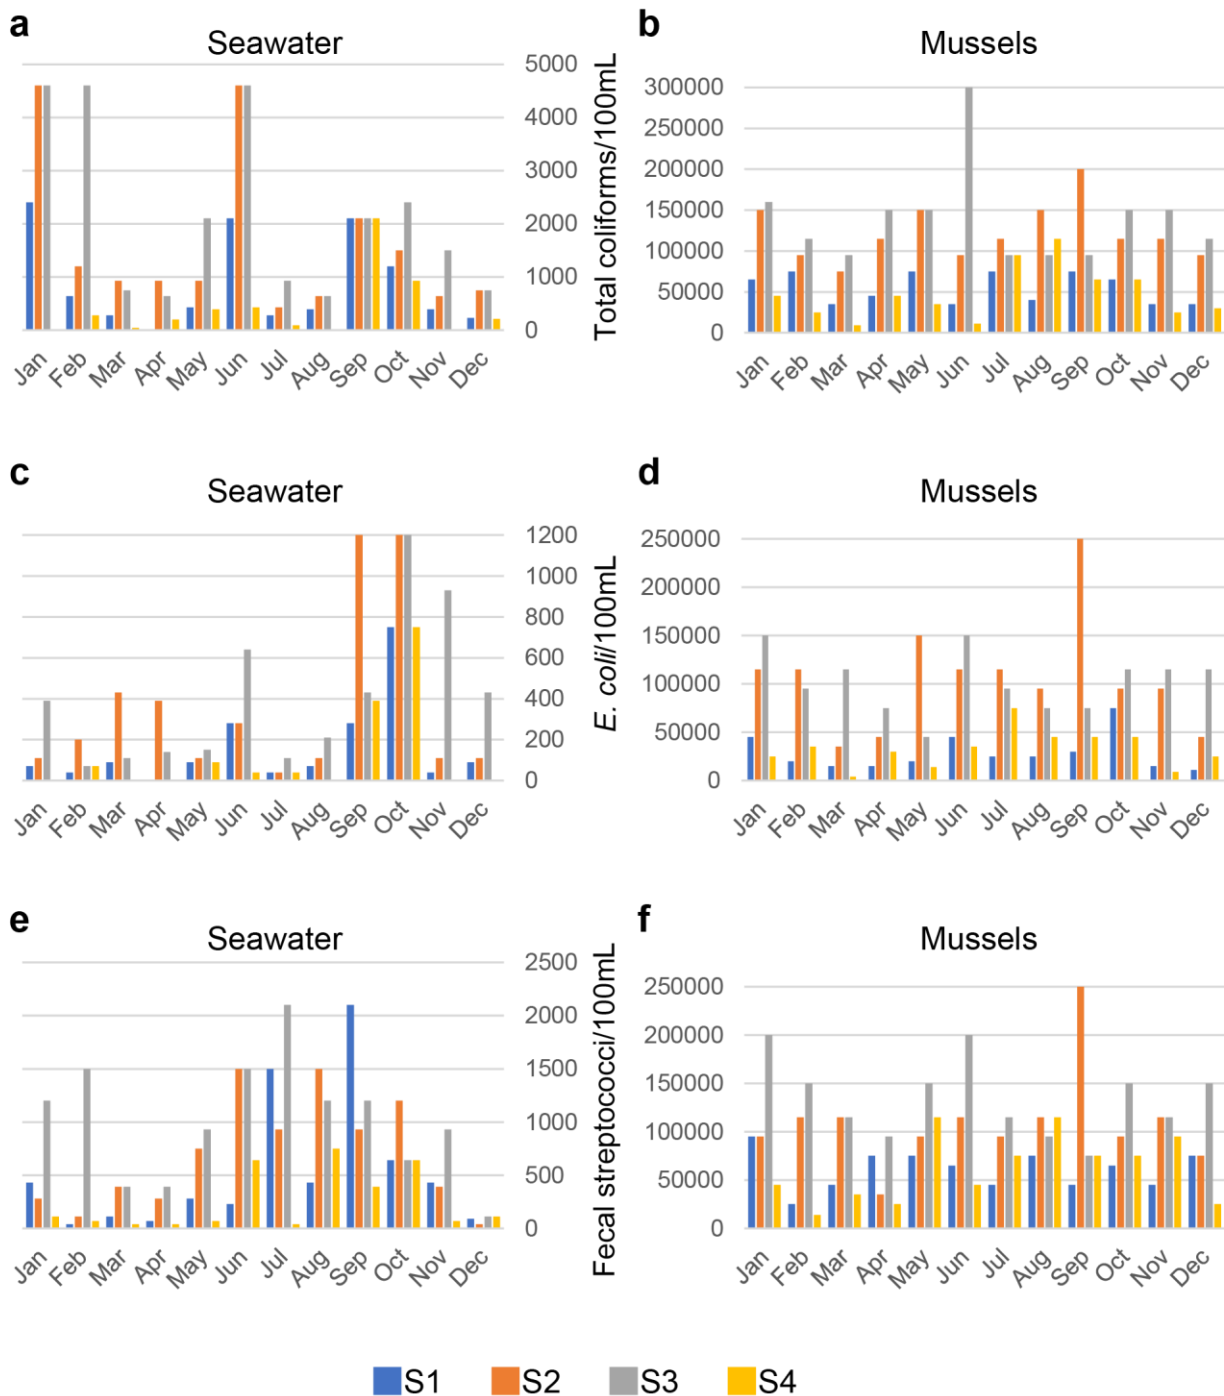

189

190 **Fig. 3** Temporal variations of fecal indicator bacteria in seawater and mussels

191 **a** and **b** Total coliforms per 100 mL, **c** and **d** *Escherichia coli* per 100 mL, **e** and **f** Fecal streptococci per  
 192 100 mL. Note that the scales are different on each diagram. S1: Cap de Garde, S2: Rezgui Rachid, S3:  
 193 Sidi Salem, S4: Lahnaya.

194

#### 195 **Pathogenic bacteria**

196 During the entire study period, a total of 208 bacterial isolates (142 from mussels and 66 from seawater)  
 197 belonging to 22 genera and 46 species were identified using biochemical tests. The most ubiquitous and

198 abundant microorganism among all the environmental samples was *E. coli* (41.4%), followed by  
 199 *Aeromonas hydrophila* (5.8%), *Klebsiella pneumoniae* (3.9%), *Pseudomonas aeruginosa* (3.4%),  
 200 *Enterobacter cloacae* (2.9%), *Vibrio parahaemolyticus* (2.9%), *Burkholderia cepacia* (2.4%),  
 201 *Morganella morganii* (2.4%), *Micrococcus spp* (1.9%) *Pseudomonas luteola* (1.9%), *Staphylococcus*  
 202 *sciuri* (1.9%), *Staphylococcus xylosus* (1.9%), *Providencia rettgeri* (1.4%), *Salmonella spp* (1.4%) and  
 203 *Yersinia enterocolitica* (1.4%) (Only species contributing more than 1% in at least one sample are shown  
 204 in Fig. 4). In the seawater samples of S1 and especially of S4, the number of pathogenic bacteria did not  
 205 exceed 14 germs, whereas in S2 and S3, their number was in the order of 16 and 27, respectively. In *P.*  
 206 *perna* samples, the number of these infectious agents was 16 in S4, 24 in S1, and 43 and 59 in S2 and  
 207 S3, respectively. (Table S1). The members of the family *Enterobacteriaceae* were importantly dominant  
 208 and presented the highest occurrence of all potentially pathogenic microorganisms (65.38%). This large  
 209 group of bacteria was extensively found in all samples of *P. perna* mussels and its presence was most  
 210 pronounced in S2 and S3 (Fig. 4; Table S1).

211

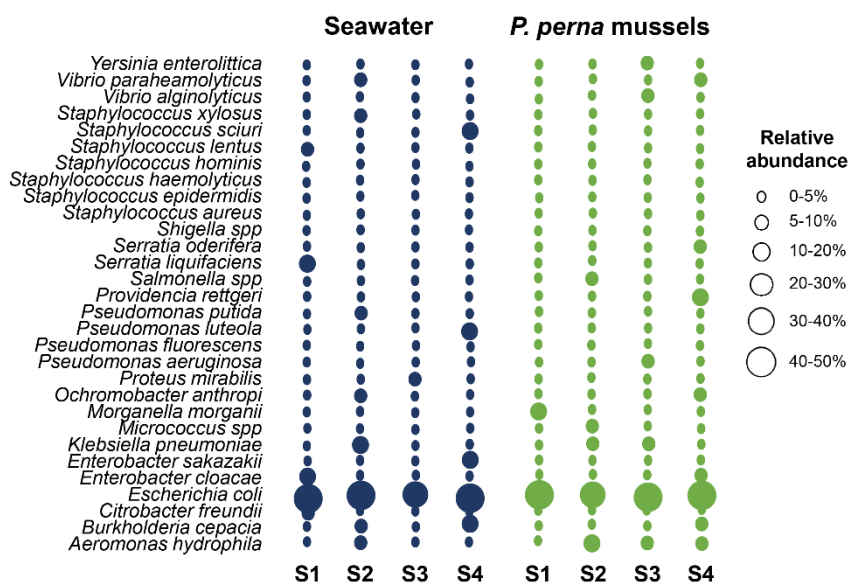

212

213 **Fig. 4** Relative abundances of potential pathogenic bacteria in seawater (blue) and *Perna perna* (green)  
 214 samples. (S1) Cap de Garde (S2) Rezgui Rachid, (S3) Sidi Salem, (S4) Lahnaya.

215

### 216 Molecular identification of selected isolates

217 In addition to biochemical identification 25 isolates of either Staphylococci or  $\gamma$ -proteobacteria were  
 218 chosen for further identification via their 16S rRNA genes. Universal primers 27F and 1492R were used  
 219 to PCR-amplify the 16S rRNA genes, and the products of approximately 1500 bp (Fig. 5) were Sanger  
 220 sequenced. The 16S rRNA sequences were compared to the NCBI database, using BLAST. All

221 sequences had between 97 and 100% identity to known bacterial species, permitting the identification  
222 of the analysed strains (Table 2). A phylogenetic tree was generated to visualize the evolutionary  
223 placement of our environmental bacteria with respect to their closest studied relatives (Fig. 6). A main  
224 clade, with high bootstrap value (100% bootstrap) grouped 17 isolates of seven genera within the family  
225 of Enterobacteriaceae; namely *Escherichia/Shigella*, *Klebsiella*, *Enterobacter*, *Citrobacter*, *Proteus* and  
226 *Morganella*. The *Staphylococci* were only represented by two isolates (BM2 and BS4) which were close  
227 to type strain *S. epidermidis* ATCC 10145<sup>T</sup> (100% bootstrap). Overall, most (18/25) of the 16S rRNA  
228 gene sequence identification results matched with the genus identification using API tests (Table 2).

229

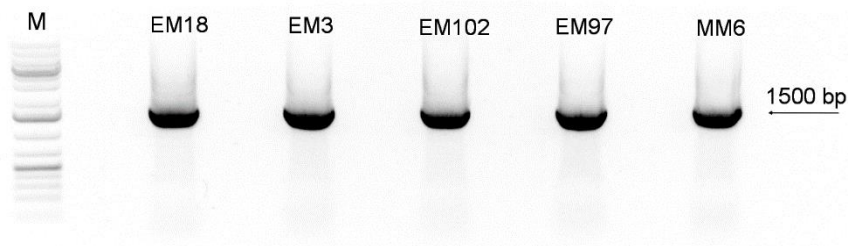

230

231 **Fig. 5** PCR amplification of the 16S rRNA gene

232 M: DNA ladder, lanes (EM18-MM6) represent amplified product (approx. 1500bp) of *E. coli* isolates.

233

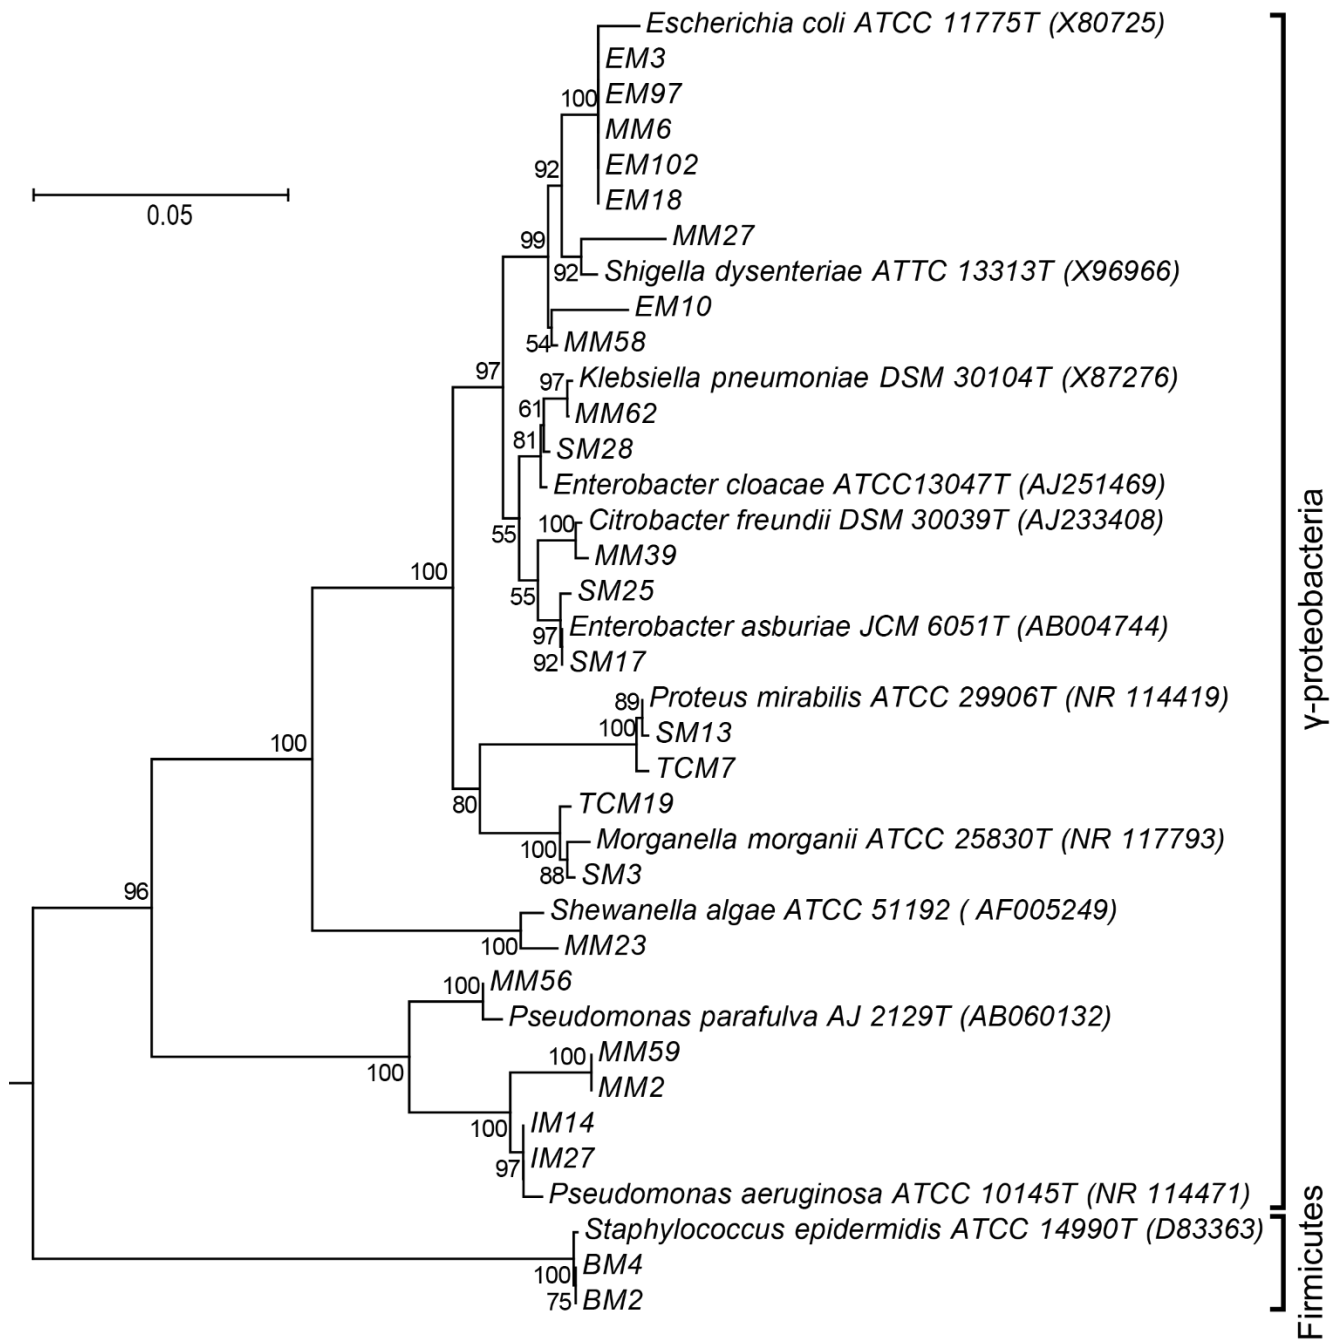

234

235 **Fig. 6** Phylogeny of the 25 isolates with molecular identification

236 16S rRNA sequences from the 25 selected isolates together with the best hit from the GenBank database  
237 for each of the sequences, were compared in a Clustal X multiple sequence alignment (Kumar et al.  
238 2016). Accession numbers of the reference sequences are in parentheses and *Halobacterium* sp. A1T  
239 was used to root the tree.

240

241 **Multi Locus Sequence Typing analysis (MLST)**

242 *E. coli* comprised more than 40% of the isolated strains, and several individual *E. coli* isolates came  
243 from the very same environmental context (i.e. same sampling-site, sample-date, and environmental

244 compartment). We therefore wondered whether these *E. coli* isolates were due to multiple separate  
245 contamination events or were caused by a single highly abundant *E. coli* strain which was able to thrive  
246 and outcompete other bacteria in the given condition. To test whether the five isolates (EM3, EM18,  
247 EM97, EM102, and MM6) isolated from *P. perna* mussels at Site 3 may belong to the same strain of *E.*  
248 *coli*, we PCR-amplified (Fig. 7) and Sanger-sequenced sections of seven conserved genes (*trpA*, *trpB*,  
249 *dinB*, *polB*, *putP*, *pabB* and *icdA*). A tree based on a multiple alignment of the concatenated sequences  
250 from our five strains (and the equivalent gene-sections from other *E. coli* strains) revealed that our  
251 isolates were most closely related to each other, and slightly more distantly to *E. coli* strains K12 and  
252 SCU-103 (Fig. 8).

253

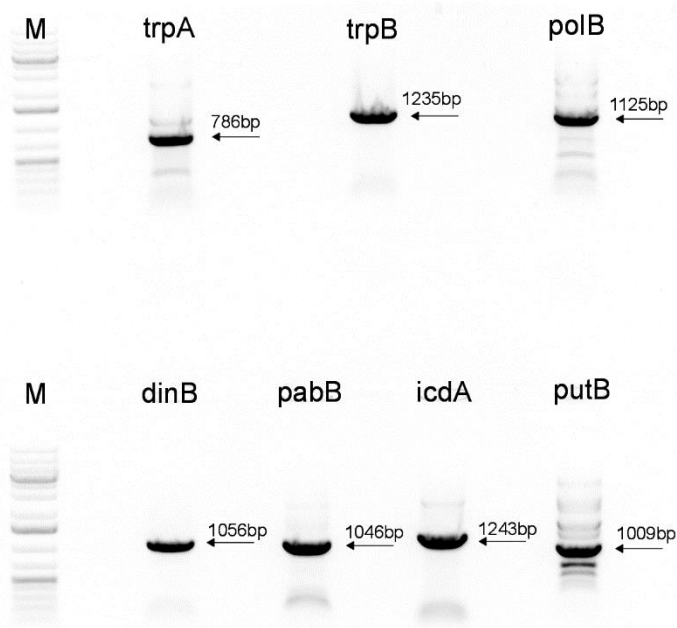

254

255 **Fig. 7** PCR amplification of seven genes of *E. coli* EM97

256 Lanes *trpA* to *putB* represent PCR products amplified from the EM97 isolate (*E. coli*). M: DNA ladder.

257

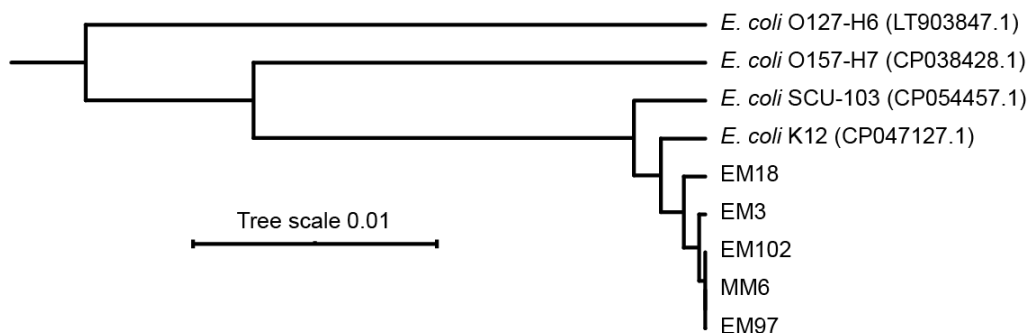

258

259 **Fig. 8** The *E. coli* strains isolated from S3 are similar but not identical

260 Phylogenetic tree showing the distances between the five analysed *E. coli* strains from S3, compared to  
261 *E. coli* strains from the NCBI database (accession numbers in parentheses). The tree was rooted using  
262 *Salmonella enterica*.

263

264

### 265 **Statistical analysis**

266 The results of Spearman's correlation analysis between FIB and physicochemical variables are given in  
267 Table 3. According to the correlation coefficients, FS appeared to be the most correlated indicator with  
268 all environmental variables except pH and SS: DO ( $r=-0.72$ ,  $p<0.0001$ ); temperature ( $r=0.64$ ,  $p<0.0001$ )  
269 and salinity ( $r=0.46$ ,  $p<0.01$ ). In contrast, EC and TC were found to be positively and significantly  
270 correlated with SS ( $r=0.51$  and  $0.57$ ; respectively, and both with  $p<0.001$ ) and negatively correlated with  
271 DO ( $r=-0.46$ ,  $p<0.01$ ;  $r=-0.37$ ,  $p<0.01$ ; respectively). Principal Component Analysis (PCA) results  
272 revealed that the three first main components together explain 92.4% of the total information (Fig. 9a  
273 and b). The first PC, which represents 56.3% of the variance, was the most significant component of the  
274 latter. It was mainly loaded by the Temperature (0.95), Salinity (0.89), Dissolved Oxygen (-0.77), SS (-  
275 0.66) and FS (0.55). The second PC, representing 22.4% of the variation, was found to be positively  
276 correlated by pH ( $r = 0.86$ ). The third PC, representing 13.7%, was positively correlated with TC and  
277 EC ( $r = 0.61$  and  $r=0.52$ , respectively). According to the PCA plot a clear opposition was observed  
278 between the 12 months of sampling and the distribution of the four sites on the first two axes. S2 and S3  
279 were strongly correlated with each other and showed maximum variations of fecal contamination during  
280 the warm months of the year, whereas S1 and S4 demonstrated lower fecal contamination variations  
281 during the cold months (Fig. S1).

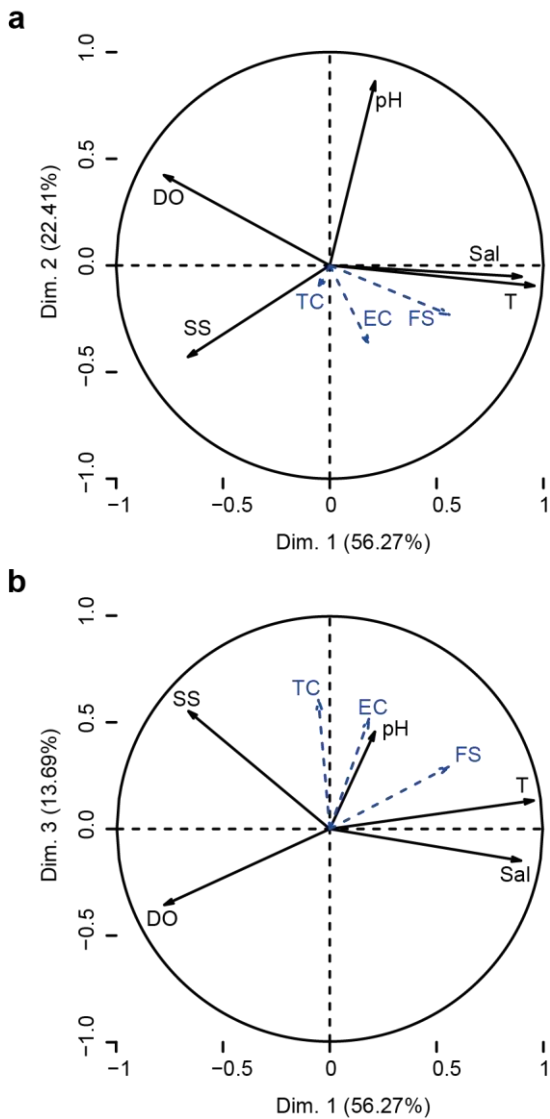

282

283 **Fig. 9** Principal component analysis (PCA) performed on data from seawater samples

284 **a** Correlation of environmental variables with the two first axes of the standard PCA. **b** Correlation of  
285 environmental variables with the first and third axes of the standard PCA. The main variables are  
286 indicated with solid arrows and supplemental variables are indicated with dotted arrows. DO: dissolved  
287 oxygen, Sal: salinity, T: water temperature, SS: Suspended solids. EC: *Escherichia coli*, TC: total  
288 coliforms and FS: fecal streptococci.

289

## 290 **Discussion**

291 The results of this study revealed a significant increase of fecal contamination in the Gulf of Annaba  
292 compared to previous studies conducted in the same area (Hidouci et al. 2014, Kadri et al. 2015, 2017)  
293 and in other coastal regions of the Mediterranean Sea (Bouhayene et al, 2014; Boutaib et al. 2015;  
294 Dallarés al. 2018; Rincé et al, 2018). Much of this difference is probably due to the continuous pollution  
295 pressure in the Gulf, mainly related to anthropogenic activities, as well as rapid urbanization over the



296 last few years. According to Grimes (2003) and Inal et al. (2018), nearly 19 million people (45% of the  
297 Algerian population) is living along the Gulfs near the largest agglomerations such as Oran, Algiers, and  
298 Annaba. In the current study, these impacts were differently manifested depending on the local sources  
299 of pollution at each site. The strong presence of FIB at S3 could be explained by significant urban,  
300 industrial and agricultural discharges that Wadi Seybouse (the second longest Wadi in Algeria) drains  
301 from its catchment basin of about 6470 km<sup>2</sup> (ABH-CSM 1999; Mebarki 2000). Besides, higher bacterial  
302 concentrations may also be attributed to untreated wastewater effluents from a large part of Annaba city  
303 and its outskirts (Bouhamra, Joannoville and, its slaughterhouse) discharged directly into the sea via  
304 Wadi Bedjima, and also to the presence of a large colony of seabirds and animals (Telailia 2014). A  
305 similar increase in fecal contamination was reported in the same area by Kadri and coworkers (2017).  
306 Our present results further demonstrated that the overall contamination was exceptionally high at S2,  
307 revealing that the waters of this site should be considered as unsafe for bathing in accordance with the  
308 Algerian Bathing Water executive decrees (JORA 1993, 2006). Similar to S3, these high levels of FIB  
309 were primarily due to the domestic wastewaters from nearby homes discharged directly into the sea  
310 without prior treatment (Kadri et al. 2017). On the other hand, the lower concentrations observed in S1  
311 and especially S4 are due to their remoteness from the city area and their particular hydrodynamics  
312 which may contribute to the dispersion of fecal pollutants in the water column (Kadri et al. 2015).  
313 Nevertheless, it is important to note that these two sites are often visited by swimmers in summer which  
314 explains the increasing levels of FIB during this period of the year (Kadri et al. 2017). According to  
315 several studies, fecal contamination at bathing beaches can be hazardous to humans because many  
316 pathogenic bacteria could be ingested during recreational water activities leading to various waterborne  
317 diseases (Marion et al. 2010; Santhiya et al. 2011; Arnold et al. 2016). It is, therefore, eminent to take  
318 exceptional protective measures by the government (proposing specific treatment solutions, especially  
319 for wastewater discharges, prohibiting direct industrial and agricultural discharges, and improving public  
320 awareness) so that these areas have optimal quality levels to avoid any health risks. Data obtained  
321 showed that the levels of FIB were alarmingly higher in *P. perna* than in the surrounding seawaters  
322 during all the study period. These outcomes are consistent with those reported in other coastal regions  
323 worldwide, suggesting that this strong accumulation capacity is mainly related to the filter-feeding  
324 behavior of these sentinel organisms, which make them one of the best bio-indicators of fecal pollution  
325 in coastal waters (Stabili et al. 2005; Martinez and Oliveira 2010; Jayme et al. 2016; Bozcal and  
326 Dagdeviren 2020). Furthermore, the levels of intestinal indicators in all sampling sites were well above  
327 the permissible limits recommended according to Regulation (854/2004/EC) of 29 April 2014 for human  
328 consumption, which recommends less than 230 *E. coli*/100g. Thus, the mussels inhabiting the Gulf of  
329 Annaba would be unfit for direct consumption. FS were present throughout the entire sampling period

330 with concentrations higher than *E. coli* in almost all samples, and this is also in agreement with previous  
331 reports (Tiefenthaler et al. 2009; Zegmout et al. 2011; Kadri et al. 2017; Islam et al. 2017). These germs  
332 are known to have a better survival period than fecal coliforms in surface waters as well as in the  
333 digestive tract of bivalves (Geldreich 1976, Noble et al. 2004). In addition to anthropogenic activities,  
334 the survival was also influenced by a multitude of natural variables, among them; the climatic changes  
335 was very likely responsible for the observed differences in bacterial concentrations in our samples.  
336 Indeed, our results demonstrated that elevated temperatures in the last spring and summer were  
337 associated with maximum FIB rates in both compartments. According to the Intergovernmental Panel  
338 on Climate Change (IPCC) Fifth Assessment Report (2013), Algeria will experience an increase in  
339 temperatures between 1 and 3.7 °C over the next few years. Consequently, this may lead to enhance the  
340 proliferation and persistence of bacteria for a long time in seawater and cause the deterioration of water  
341 resources (Mohammed and Al-Amin 2018, Barreras et al. 2019). This hypothesis was confirmed in the  
342 current study by significant and positive correlations between *E. coli* and FS, and the temperature  
343 revealed by Spearman correlation test ( $p < 0.05$ ) and PCA analysis, which is consistent with other studies  
344 (Koirala et al. 2008; Gutiérrez-Cacciabue et al. 2014, Abia et al. 2015; Islam et al. 2017). Another  
345 probable reason for the high levels of FIB in *P. perna* in this period is probably the physiology of this  
346 sentinel species. Burge et al. (2016) have indicated that elevated temperatures promote the filtration rates  
347 in mussels and, therefore, they can retain more microorganisms from the surrounding waters. Besides  
348 the temperature, salinity is also a crucial variable for the survival of FIB in aquatic environments. In our  
349 study, only FS showed a significant positive correlation ( $p < 0.001$ ) with salinity (Table 3). These germs  
350 are known for their high resistance to harsh environmental stressors and tolerance to high concentrations  
351 to salt, making them powerful indicators of fecal contamination (Byappanahalli et al. 2012). Conversely,  
352 DO show the strongest correlations with all groups of FIB, mainly due to the bacterial degradation of  
353 detritus which consumes a lot of oxygen. This biodegradation was more important with the increase in  
354 temperature in summer (5 mg/L) (Fig. 2), especially in highly contaminated sites, which receive massive  
355 quantities of domestic discharges and industrial effluents. These findings are in agreement with those of  
356 a recent study by Chávez-Díaz et al. (2020), which found negative correlations between DO and FIB.  
357 The latter were found to be positively correlated with SS, which, according to the literature, play a  
358 protective role for intestinal bacteria against solar radiation and predators (Walters et al. 2014; Kadri et  
359 al. 2017). This appears to be the case for the SS- rich waters of S2 and S3, which reportedly contain  
360 large quantities of FIB. Numerous studies have indicated that FIB are used as surrogates to estimate the  
361 possible presence of pathogenic microorganisms, especially when they are found at high levels (Wilkes  
362 et al. 2011; Shoults and Ashbolt 2018). In Algeria and especially in the Gulf of Annaba, very few studies  
363 on the presence of bacterial pathogens in the mussels and recreational waters, and their human health

364 risks were investigated. Similar to the study conducted by Stabili et al. (2005) and Cavallo et al. (2008)  
365 in the Northern Ionian Sea of Italy, the bacterial community of *P. perna* mussels from all sites in our  
366 study was very similar to that of surrounding waters but with higher abundance. Proteobacteria was the  
367 most dominant phylum (88/208, 46%) represented mainly by members of the family *Enterobacteriaceae*  
368 and divided into two major groups: enteric and marine or environmental bacteria. Among enteric  
369 bacteria, *Salmonella*, *Shigella* and, *E. coli* are known to be the bacteria that are most involved in human  
370 gastrointestinal tract infections. According to Yang et al. (2017), 1.7 billion cases of human diarrhea  
371 caused primarily by pathogenic strains of *E.coli* have been recorded worldwide each year. Similarly,  
372 Sánchez -Vargas et al. (2011) and Neogi et al. (2014) reported that *Salmonella typhi* causing enteric  
373 fever affected approximately 450 per 100,000 children in India and Pakistan. These results indicated that  
374 domestic wastes, especially from the most polluted sites are most likely the primary source of pollution  
375 in the Gulf of Annaba since enteric bacteria are mainly derived from the excrement of warm-blooded  
376 animals, including humans (Poharkar et al. 2017). Environmental bacteria such as *Pseudomonas*,  
377 *Aeromonas*, and *Shewanella* were also identified in both environmental compartments. Species of the  
378 genus *Aeromonas* are widely isolated from aquatic environments and frequently reported to cause  
379 waterborne and seafood infections (gastroenteritis and septicemia) (Chopra and Houston 1999; Joseph  
380 et al. 2013; Hamid et al. 2016). *Pseudomonas* spp. are another ubiquitous microorganisms found in  
381 marine shellfish and recreational waters (Maravić et al. 2018; Goh et al. 2019). These multidrug-resistant  
382 pathogens have been previously reported to be associated with diarrhea, intra-abdominal and  
383 nosocomial infections, particularly in immune-compromised patients (Morrissey et al. 2013; Streeter  
384 and Katouli 2016). The results of biochemical identification also revealed the detection of different  
385 species of the genus *Vibrio* in the four sampling sites, of which *V. parahaemolyticus* was the most  
386 isolated microorganism. Our findings are consistent with the results of numerous studies conducted  
387 worldwide (Stabili et al. 2005; Esteves et al. 2015; Vezzulli et al. 2018; Nguyen et al. 2018; Hackbusch  
388 et al. 2020). *Vibrio*. spp are waterborne bacteria naturally found in estuarine and coastal environments.  
389 Yet, certain species can be pathogenic to humans and marine organisms such as bivalves (Eggermont et  
390 al. 2017; Rincé et al. 2018; Bozcal and Dagdeviren, 2020). In August 2018, the Algerian Ministry of  
391 Health reported a cholera outbreak in Blida and five other regions (Algiers, Tipaza, Bouira, Médéa, and  
392 Ain Defla) in the north of the country. This devastating and strictly human epidemic caused mainly by *V.*  
393 *cholera* O1 or O139 can cause serious outbreaks such as severe dehydrating diarrhea and even death  
394 (Feldhusen 2000). In the Gulf of Annaba, this germ was found in S3 mussels in the same period of the  
395 outbreak classifying this site as the area of highest risk. In addition to *Enterobacteriaceae*, 24 isolates of  
396 the genus *Staphylococcus* were also detected during the study period. These germs, including *S. aureus*,  
397 are well- known causative agents of several diseases in humans such as skin rashes, pneumonia, ear and

398 eye infections, endocarditis and, meningitis (Schets et al. 2020; Yaghoubzadeh et al. 2020). According  
399 to Pomykala et al. (2012), some coagulase-positive staphylococci are common seafood pathogens and  
400 may pose a significant risk to human health through improper consumption of bivalve mollusks.  
401 Furthermore, methicillin-resistant *S. aureus* (MRSA), which is one of the most harmful pathogens on  
402 human health, has also been frequently detected on several recreational beaches in the United States  
403 (Abdelzaher et al. 2010; Levin-Edens et al. 2012; Plano et al. 2013; Thapaliya et al. 2017). As mentioned  
404 above, the biochemical identification results revealed that isolated bacteria were primary members of  
405 the *Enterobacteriaceae* family. Strains of this large group of bacteria are known to be closely related to  
406 each other and difficult to distinguish by conventional methods (Nhung et al. 2007; Hamdi et al. 2017).  
407 Besides, the use of biochemical identification alone can be problematic as some new taxa may not be  
408 included in available databases (Janda and Abbott 2002). For this reason, additional molecular  
409 identification targeting the 16S rRNA gene was performed on 25 strains, including two Gram-positive  
410 bacteria isolated from *P. perna* mussels of S3. In general, the biochemical identification at the genus  
411 level was confirmed in 72% of the cases by the 16S rRNA gene sequencing (Table 2). This molecular  
412 method proved to be more accurate for bacterial identification as all strains exhibited more than 97%  
413 sequence similarities with their matching sequences retrieved from the GenBank database. The  
414 ribosomal 16S rRNA gene has highly conserved regions in all bacterial cells, interspersed with nine  
415 hyper-variable stretches of sequences (V1-V9), and is a molecular fingerprint for bacterial identification  
416 and taxonomic classification (Benga et al. 2014; Jo et al. 2016; Monticelli et al. 2019). This method also  
417 has minor limitations such as high sequence similarities among closely related species (Jo et al. 2016).  
418 Therefore, the use of more than one target gene, especially genes that are more susceptible to genomic  
419 drift than the 16S rRNA gene, provide a more detailed differentiation between closely related bacterial  
420 isolates. For the strains (EM3, EM18, EM97, EM102, and MM6) identified as *E. coli* using API tests  
421 and 16S rRNA gene sequencing, MLST was performed to further understand their phylogenetic  
422 relationships. Interestingly, the results indicate that our isolates were very similar to each other but  
423 nevertheless distinct, and therefore did not belong to the same strain of *E. coli* (Fig. 8). This suggests  
424 that they came from a variety of separate human and animal sources of fecal contamination, since *E. coli*  
425 is mainly found in the fecal wastes of warm-blooded mammals (Poharkar et al. 2017). Therefore, the  
426 use of Microbial Source Tracking (MST) technique to identify both human and animal specific markers  
427 in future studies will be an important tool for understanding the origin of fecal pollution in the Gulf of  
428 Annaba, and for assessing the associated health risks related to the presence of pathogenic  
429 microorganisms.

430

## 431 **Conclusion**

432 The current study revealed that the presence of fecal indicators in the marine waters and mussels of the  
433 Gulf of Annaba was strongly affected by both anthropogenic activities and environmental variables.  
434 Multiple analysis showed that *P. perna* was the most contaminated sample with the highest levels of FIB  
435 in all sampling sites, especially those located inside the Gulf (S2 and S3) near Annaba. These principal  
436 findings validate our choice to use this species as an effective bio-indicator to assess the microbial quality  
437 of coastal waters. Our results also demonstrated that different pathogenic bacteria were detected during  
438 the study period. The survival and the presence of these infectious agents in *P. perna* is a matter of great  
439 concern regarding epidemic diseases that they may occur when consumed by humans. Therefore, the  
440 implementation of necessary measures should be carried out, especially in highly polluted sites in order  
441 to protect environmental resources and human health.

442

#### 443 **Declarations**

##### 444 **Ethics approval and consent to participate**

445 Not applicable

##### 446 **Consent for publication**

447 Not applicable

##### 448 **Availability of data and materials**

449 The datasets used and/or analysed during the current study are available from the corresponding author  
450 (Mouna Boufafa) on reasonable request.

##### 451 **Competing interests**

452 The authors state no competing interest

##### 453 **Funding**

454 This work was supported by the General Directorate for Scientific Research and Technological  
455 Development (DGRSDT), Algeria. Paul Sabatier University, Laboratoire de Microbiologie et Génétique  
456 Moléculaires (UMR5100) and Centre de Biologie Intégrative. The funding bodies had no role in the  
457 design of the study and collection, analysis, and interpretation of data, nor in writing the manuscript.

##### 458 **Authors' contributions**

459 MBo performed the experiments. MBo, SK and MBe analysed the environmental sampling data. PR  
460 analysed the MLST data. MBo, SK, PR and MBe wrote the paper.

##### 461 **Acknowledgements**

462 The authors would like to thank Dr. Hassen Touati and Dr. Fatma Guellati Bouyema for their assistance  
463 in the statistical analysis of data.

464

##### 465 **References**



- 466 Abdelzaher AM, Wright ME, Ortega C et al (2010) Presence of pathogens and indicator microbes at a  
467 non-point source subtropical recreational marine beach. *Appl Environ Microbiol* 76: 724-732.  
468 <https://doi.org/10.1128/AEM.02127-09>
- 469 Abdennour C, Smith B, Boulakoud M, Samraoui B, Rainbow PS (2000) Trace metals in marine, brackish  
470 and freshwater prawns (Crustacea, Decapoda) from northeast Algeria. *Hydrobiologia* 432:217-227.  
471 <https://doi.org/10.1023/A:1004027204088>
- 472 ABH-CSM (1999-2000) The Agency's Notebooks. In: River Basin Agency Constantinois Seybouse-  
473 Mellegue, Constantine, the Seybouse basin 1: 35
- 474 Abia ALK, Ubomba-Jaswa E, Momba MNB (2015) Impact of seasonal variation on *Escherichia coli*  
475 concentrations in the riverbed sediments in the Apies River, South Africa. *Sci Total Environ* 537:462–  
476 469. <http://dx.doi.org/10.1016/j.scitotenv.2015.07.132>
- 477 Aminot A, Chaussepied M (1983) Manual of marine chemical analysis. CNEXO, Brest (in French)
- 478 Amri S, Samar MF, Sellem F, Ouali K (2017) Seasonal antioxidant responses in the sea urchin  
479 *Paracentrotus lividus* (Lamarck 1816) used as a bioindicator of the environmental contamination in the  
480 South-East Mediterranean. *Mar Pollut Bull* 122: 392-402.  
481 <http://dx.doi.org/10.1016/j.marpolbul.2017.06.079>
- 482 Arnold BF, Wade TJ, Benjamin-Chung J et al (2016) Acute gastroenteritis and recreational water:  
483 highest burden among young US children. *Am J Public Health* 106:1690-1697.  
484 <http://dx.doi.org/10.2105/AJPH.2016.303279>
- 485 Barreras Jr H, Kelly EA, Kumar N, Solo-Gabriele HM (2019) Assessment of local and regional strategies  
486 to control bacteria levels at beaches with consideration of impacts from climate change. *Mar Pollut Bull*  
487 138:249-259. <https://doi.org/10.1016/j.marpolbul.2018.10.046>
- 488 Belabed BE, Laffray X, Dhib A, Fertouna-Belakhal M, Turki S, Aleya L (2013) Factors contributing to  
489 heavy metal accumulation in sediments and in the intertidal mussel *Perna perna* in the Gulf of Annaba  
490 (Algeria). *Mar Pollut Bull* 74:477-489. <https://doi.org/doi:10.1016/j.marpolbul.2013.06.004>
- 491 Benga L, Benten WPM, Engelhardt E, Köhrer K, Gougoula C, Sager M (2014) 16S ribosomal DNA  
492 sequence-based identification of bacteria in laboratory rodents: a practical approach in laboratory animal  
493 bacteriology diagnostics. *Lab Anim* 48:305-312. <https://doi.org/10.1177/0023677214538240>
- 494 Bjedov I, Lecointre G, Tenaillon O et al (2003) Polymorphism of gene encoding SOS polymerases in  
495 natural populations of *Escherichia coli*. *DNA Repair* 2:417-426. [https://doi.org/10.1016/S1568-7864](https://doi.org/10.1016/S1568-7864(02)00241-0)  
496 (02)00241-0
- 497 Bouhayene S, Djebar AB (2014) Evaluation of the microbiological quality of the seawater of the main  
498 beaches of Skikda (East-Algerian). *Ann Biol Res* 5: 40-45

- 499 Boutaib R, Azhari H, Abid M, Marhraoui M (2015) Comparison of *Escherichia coli* levels in shellfish  
500 from Mediterranean coast, Morocco. *Global Advanced Research Journal of Microbiology* 4 :10.
- 501 Bozcal E, Dagdeviren M (2020) Bacterial metagenome analysis of *Mytilus galloprovincialis* collected  
502 from Istanbul and Izmir coastal stations of Turkey. *Environ Monit Assess* 192: 1-18.  
503 <https://doi.org/10.1007/s10661-020-8129-1>
- 504 Burge CA, Closek CJ, Friedman CS et al (2016) The use of filter feeders to manage disease in a changing  
505 world. *Integr Comp Biol* 56: 573–587. <https://doi.org/10.1093/icb/icw048>
- 506 Byappanahalli MN, Nevers MB, Korajkic A, Staley ZR, Harwood VJ (2012) Enterococci in the  
507 environment. *Microbiol Mol Biol Rev* 76:685-706. <https://doi.org/10.1128/MMBR.00023-12>
- 508 Cavallo R, Acquaviva M, Stabili L (2009) Culturable heterotrophic bacteria in seawater and *Mytilus*  
509 *galloprovincialis* from a Mediterranean area (Northern Ionian Sea–Italy). *Environ Monit Assess* 149:  
510 465-475. <https://doi.org/10.1007/s10661-008-0223-8>
- 511 Chávez-Díaz LV, Gutiérrez-Cacciabue D, Poma HR, Rajal VB (2020) Sediments quality must be  
512 considered when evaluating freshwater aquatic environments used for recreational activities. *Int J Hyg*  
513 *Envir Heal* 223:159-170. <https://doi.org/10.1016/j.ijheh.2019.09.007>
- 514 Chopra AK, Houston CW (1999) Enterotoxins in *Aeromonas*-associated gastroenteritis. *Microbes Infect*  
515 1:1129–1137. [https://doi.org/10.1016/S1286-4579\(99\)00202-6](https://doi.org/10.1016/S1286-4579(99)00202-6)
- 516 Dallarés S, Carrasco N, Álvarez-Muñoz D, Rambla-Alegre M, Solé M (2018) Multibiomarker  
517 biomonitoring approach using three bivalve species in the Ebro Delta (Catalonia, Spain). *Environ Sci*  
518 *Pollut Res* 25:36745-36758. <https://doi.org/10.1007/s11356-018-3614-6>
- 519 Damak M, Fourati R, Elleuch B, Kallel M (2020) Environmental quality assessment of the fish farms’  
520 impact in the Monastir Bay (eastern of Tunisia, Central Mediterranean): a benthic foraminiferal  
521 perspective. *Environ Sci Pollut Res* 27:9059–9074. <https://doi.org/10.1007/s11356-019-07523-7>
- 522 da Silva MAC, Cavalett A, Spinner A et al. (2013) Phylogenetic identification of marine bacteria isolated  
523 from deep-sea sediments of the eastern South Atlantic Ocean. *Springer Plus* 2: 127.  
524 <https://doi.org/10.1186/2193-1801-2-127>
- 525 Eggermont M, Bossier P, Pande GSJ et al (2017) Isolation of *Vibrionaceae* from wild blue mussel  
526 (*Mytilus edulis*) adults and their impact on blue mussel larviculture. *Fems Microbiol Ecol* 93: 4.  
527 <https://doi.org/10.1093/femsec/fix039>
- 528 Escobar- Paramo P, Giudicelli C, Parsot C, Denamur E (2003) The evolutionary history of *Shigella* and  
529 enteroinvasive *Escherichia coli* revised. *J Mol Evol* 57:140-148. <https://doi.org/10.1007/s00239-003->  
530 2460-3



- 531 Escobar-Páramo P, Sabbagh A, Darlu P et al (2004) Decreasing the effects of horizontal gene transfer  
532 on bacterial phylogeny: the *Escherichia coli* case study. *Mol Phylogenet Evol* 30: 243-250.  
533 [https://doi.org/10.1016/S1055-7903\(03\)00181-7](https://doi.org/10.1016/S1055-7903(03)00181-7)
- 534 Esteves K, Hervio-Heath D, Mosser T et al (2015) Rapid proliferation of *Vibrio parahaemolyticus*,  
535 *Vibrio vulnificus*, and *Vibrio cholerae* during freshwater flash floods in French Mediterranean coastal  
536 lagoons. *Appl Environ Microbiol* 81: 7600–7609. <https://doi.org/10.1128/AEM.01848-15>
- 537 Feldhusen F (2000) The role of seafood in bacterial foodborne diseases. *Microbes Infect* 2: 1651-1660.
- 538 Fouillet A, Fournet N, Forgeot C et al (2020) Large concomitant outbreaks of acute gastroenteritis  
539 emergency visits in adults and food-borne events suspected to be linked to raw shellfish, France,  
540 December 2019 to January 2020. *Euro Surveil* 25: 2000060. [https://doi.org/10.2807/1560-](https://doi.org/10.2807/1560-7917.ES.2020.25.7.2000060)  
541 [7917.ES.2020.25.7.2000060](https://doi.org/10.2807/1560-7917.ES.2020.25.7.2000060)
- 542 Geldreich EE, Litsky W (1976) Fecal coliform and fecal streptococcus density relationships in waste  
543 discharges and receiving waters. *Crit Rev Env Sci Tec* 6:349-369.  
544 <https://doi.org/10.1080/10643387609381645>
- 545 Ghozzi K, Marangi M, Papini R et al (2017) First report of Tunisian coastal water contamination by  
546 protozoan parasites using mollusk bivalves as biological indicators. *Mar Pollut Bull* 117:197-202.  
547 <https://doi.org/doi:10.1016/j.marpolbul.2017.01.057>
- 548 Goh SG, Saeidi N, Gu X et al (2019) Occurrence of microbial indicators, pathogenic bacteria and viruses  
549 in tropical surface waters subject to contrasting land use. *Water res* 150: 200-215.  
550 <https://doi.org/10.1016/j.watres.2018.11.058>
- 551 Grimes S (2003) Assessment and National Diagnosis of the marine pollution of the Algerian coast  
552 related to activities carried out on land. In: Strategic Action Program (SAP) to combat pollution from  
553 land-based activities and its operational strategy. Final Report MAP/PAS MED/MEDPOL, pp 119
- 554 Gutiérrez-Cacciabue D, Teich I, Poma HR, Cruz MC, Balzarini M, Rajal VB (2014) Strategies to  
555 optimize monitoring schemes of recreational waters from Salta, Argentina: a multivariate approach.  
556 *Environ Monit Assess* 186:8359-8380. <https://doi.org/10.1007/s10661-014-4010-4>
- 557 Guttman DS, Dykhuizen DE (1994) Detecting selective sweeps in naturally occurring *Escherichia coli*.  
558 *Genetics* 138:993-1003
- 559 Hackbusch S, Wichels A, Gimenez L, Döpke H, Gerdt G (2020) Potentially human pathogenic *Vibrio*  
560 spp. in a coastal transect: Occurrence and multiple virulence factors. *Sci Total Environ* 707:136113.  
561 <https://doi.org/10.1016/j.scitotenv.2019.136113>
- 562 Hall TA (1999) BioEdit: a user-friendly biological sequence alignment editor and analysis program for  
563 Windows 95/98/NT. *Nucleic Acids Symp Series*. 41: 95-98

- 564 Hamdi S, Rousseau GM, Labrie SJ, Tremblay DM, Kourda RS, Slama KB, Moineau S (2017)  
565 Characterization of two polyvalent phages infecting Enterobacteriaceae. *Sci Rep* 7:1-12.  
566 <https://doi.org/10.1038/srep40349>
- 567 Hamid R, Ahmad A, Usup G (2016) Pathogenicity of *Aeromonas hydrophila* isolated from the  
568 Malaysian Sea against coral (*Turbinaria* sp.) and sea bass (*Lates calcarifer*). *Environ Sci Pollut Res* 23:  
569 17269-17276. <https://doi.org/10.1007/s11356-016-6655-8>
- 570 Hidouci S, Djebar AB, Amara R, Sahraoui EH (2014) Bacterial quality of coastal waters of Annaba  
571 (East Algeria). *Eur J Sci Res* 120: 488-493
- 572 Inal A, Boulahdid M, Angelleti B, Radakovitch O (2018) Levels and ecological risk assessment of heavy  
573 metals in surface sediments of fishing grounds along Algerian coast. *Mar Pollut Bull* 136: 322–333.  
574 <https://doi.org/10.1016/j.marpolbul.2018.09.029>
- 575 Intergovernmental Panel on Climate Change (IPCC) (2013) *Climate Change 2013: The Physical Science*  
576 *Basis. Working Group I Contribution to the IPCC Fifth Assessment Report*, Cambridge University Press,  
577 Cambridge, United Kingdom. [www.ipcc.ch/report/ar5/wg1](http://www.ipcc.ch/report/ar5/wg1)
- 578 Islam MM, Hofstra N, Islam MA (2017) The impact of environmental variables on faecal indicator  
579 bacteria in the Betna river basin, Bangladesh. *Environ Process* 4:319-332. [https://doi.org](https://doi.org/10.1007/s40710-017-0239-6)  
580 [10.1007/s40710-017-0239-6](https://doi.org/10.1007/s40710-017-0239-6)
- 581 Janda JM, Abbott SL (2002) Bacterial identification for publication: when is enough enough? *J Clin*  
582 *Microbio* 40:1887-1891. <https://dx.doi.org/10.1128/FJCM.40.6.1887-1891.2002>
- 583 Jayme M, Silva M, Sales A, Nunes M, Freitas-Almeida A, Araújo FV (2016) Survey of pathogens  
584 isolated from mussels *Perna Perna* collected in rocky shore and fish market of Niterói, RJ, and Their  
585 Respective Resistance Profile to Antimicrobial Drugs. *J Food Qual* 39:383-390.  
586 <https://doi.org/10.1111/jfq.12204>
- 587 Jia Y, Wang L, Qu Z, Yang Z (2018) Distribution, contamination and accumulation of heavy metals in  
588 water, sediments, and freshwater shellfish from Liuyang River, Southern China. *Environ. Sci Pollut Res*  
589 *Int* 25:7012-7020. <https://doi.org/10.1007/s11356-017-1068-x>
- 590 Jo JH, Kennedy EA, Kong HH (2016) Research techniques made simple: bacterial 16S ribosomal RNA  
591 gene sequencing in cutaneous research. *J Invest Dermatol* 136: e23-e27.  
592 <https://doi.org/10.1016/j.jid.2016.01.005>
- 593 JORA (1993) Official Journal of the Algerian Republic No. 46 Executive Decree No. 93-164 of  
594 10/07/1993, pp 11 (in French)
- 595 JORA (2006) Official Journal of the Algerian Republic No. 26 Executive Decree No. 06-141 of 19  
596 /04/2006, pp 4-9 (in French)

- 597 Joseph AV, Sasidharan RS, Nair HP, Bhat SG (2013) Occurrence of potential pathogenic *Aeromonas*  
598 species in tropical seafood, aquafarms and mangroves off Cochin coast in South India. *Vet World* 6:300–  
599 306. [http://dx.doi.org/ 10.5455/vetworld.2013.300-306](http://dx.doi.org/10.5455/vetworld.2013.300-306)
- 600 Kadri S, Dahel A, Djebbari N, Barour C, Bensouilah M (2015) Environmental parameters influence on  
601 the bacteriological water quality of the Algerian North East coast . *Adv Environ Biol* 9: 180-189
- 602 Kadri S, Belhaoues S, Touati H, Boufafa M, Djebbari N, Bensouilah M (2017) Environmental  
603 parameters and bacteriological quality of the *Perna perna* mussel (North East Algerian coast). *Int J Biosci*  
604 11: 151-165. <http://dx.doi.org/10.12692/ijb/11.5.151-165>
- 605 Kobayashi D, Saito M, Heike Y, Yokota K, Arioka H, Oshitani H (2019) The association between  
606 consuming bivalves, and acute gastroenteritis and norovirus in Tokyo, Japan. *J Med Virol* 91: 986-996.  
607 <https://doi.org/10.1002/jmv.25416>
- 608 Koirala SR, Gentry RW, Perfect E, Schwartz JS, Sayler GS (2008) Temporal variation and persistence  
609 of bacteria in streams. *J Environ Qual* 37: 1559-1566. [https://doi.org/ 10.2134/jeq2007.0310](https://doi.org/10.2134/jeq2007.0310)
- 610 Kumar S, Stecher G, Tamura K (2016) MEGA7: molecular evolutionary genetics analysis version 7.0  
611 for bigger datasets. *Mol Biol Evol* 3: 1870-1874. <https://doi.org/10.1093/molbev/msw054>
- 612 Lane DJ (1991) 16S/23S rRNA sequencing. In: Stackebrandt E, Goodfellow M (Ed) *Nucleic acid*  
613 *techniques in bacterial systematics*. Wiley, New York, pp 115-175
- 614 Le Guyader FS, Bon F, DeMedici D et al (2006) Detection of multiple noroviruses associated with an  
615 international gastroenteritis outbreak linked to oyster consumption. *J Clin Microbiol* 44: 3878-3882.  
616 <https://doi:10.1128/JCM.01327-06>
- 617 Letunic I, Bork P (2019) Interactive Tree Of Life (iTOL) v4: recent updates and new developments.  
618 *Nucleic Acids Res* 47: W256–W259. <https://doi.org/10.1093/nar/gkz239>
- 619 Levin-Edens E, Soge OO, No D, Stiffarm A, Meschke JS, Roberts MC (2012) Methicillin-resistant *S*  
620 *taphylococcus aureus* from Northwest marine and freshwater recreational beaches. *Fems Microbiol Ecol*  
621 79:412-420. <https://doi.org/10.1111/j.1574-6941.2011.01229.x>
- 622 Madeira F, Park YM, Lee J et al (2019) The EMBL-EBI search and sequence analysis tools APIs in  
623 2019. *Nucleic Acids Res* 47:W636-W641. <https://doi.org/10.1093/nar/gkz268>.
- 624 Maravić A, Šamanić I, Šprung M et al (2018) Broad-spectrum resistance of *Pseudomonas aeruginosa*  
625 from shellfish: infrequent acquisition of novel resistance mechanisms. *Environ Monit Assess* 190:81.  
626 <https://doi.org/10.1007/s10661-018-6471-3>
- 627 Marion J, Lee J, Lemeshow S, Buckley TJ (2010) Association of gastrointestinal illness and recreational  
628 water exposure at an inland US beach. *Water Res* 44: 4796-4804. [https://doi.org/](https://doi.org/10.1016/j.watres.2010.07.065)  
629 [10.1016/j.watres.2010.07.065](https://doi.org/10.1016/j.watres.2010.07.065)

- 630 Martinez DI, Oliveira AJFCD (2010) Faecal bacteria in *Perna perna* (Linnaeus, 1758) (Mollusca:  
631 Bivalvia) for biomonitoring coastal waters and seafood quality. *Braz J Oceanogr* 58:29-35.  
632 <http://dx.doi.org/10.1590/S1679-87592010000700005>
- 633 Mebarki A (2000) Low water flows, effluents and protection of water resources in the Mediterranean  
634 basins of eastern Algeria. In *Geocarrefour* 75: 399-416
- 635 Mohammed T, Al-Amin AQ (2018) Climate change and water resources in Algeria: vulnerability,  
636 impact and adaptation strategy. *Econ Environ Stud* 18:411–429.  
637 <https://doi.org/10.25167/ees.2018.45.23>
- 638 Monticelli LS, Decembrini F, Bergamasco A, Caruso G (2019) Water quality assessment of transitional  
639 and coastal marine Sicilian waters (Italy): Ecological and epidemiological significance of multiple  
640 antimicrobial resistant *Enterococcus* spp. *Estuar Coast Shelf Sci* 217:173-184.  
641 <https://doi.org/10.1016/j.ecss.2018.11.021>
- 642 Morrissey I, Hackel M, Badal R, Bouchillon S, Hawser S, Biedenbach D (2013) A review of ten years  
643 of the Study for Monitoring Antimicrobial Resistance Trends (SMART) from 2002 to 2011.  
644 *Pharmaceuticals* 6: 1335–1346. <https://doi.org/10.3390/ph6111335>
- 645 Neogi SB, Yamasaki S, Alam M, Lara RJ (2014) The role of wetland microinvertebrates in spreading  
646 human diseases. *Wetl Ecol Manag* 22:469-491. <https://doi.org/10.1007/s11273-014-9373-3>
- 647 Nguyen TV, Alfaro AC, Young T, Ravi S, Merien F (2018) Metabolomics study of immune responses  
648 of New Zealand greenshell™ mussels (*Perna canaliculus*) Infected with Pathogenic *Vibrio* sp. *Mar*  
649 *Biotechnol* 20:396-409. <https://doi.org/10.1007/s10126-018-9804-x>
- 650 Nhung PH, Ohkusu K, Mishima N et al (2007) Phylogeny and species identification of the family  
651 Enterobacteriaceae based on dnaJ sequences. *Diagn Micro Infect Dis* 58:153-161.  
652 <https://doi.org/10.1016/j.diagmicrobio.2006.12.019>
- 653 Noble RT, Lee IM, Schiff KC (2004) Inactivation of indicator micro-organisms from various sources of  
654 fecal contamination in seawater and freshwater. *J Appl Microbiol* 96: 464-472.  
655 <https://doi.org/10.1111/j.1365-2672.2004.02155.x>
- 656 O'Hara Z, Crossan C, Craft J, Scobie L (2018) First report of the presence of hepatitis E virus in Scottish-  
657 harvested shellfish purchased at retail level. *Food Environ Virol* 10: 217-221.  
658 <https://doi.org/10.1007/s12560-018-9337-5>
- 659 Ouali N, Belabed BE, Chenchouni H (2018) Modelling environment contamination with heavy metals  
660 in flathead grey mullet *Mugil cephalus* and upper sediments from north African coasts of the  
661 Mediterranean Sea. *Sci Total Environ* 639:156-174. <https://doi.org/10.1016/j.scitotenv.2018.04.377>

- 662 Ozkan D, Dagdeviren M, Katalay S, Guner A, Yavasoglu NU (2017) Multi-biomarker responses after  
663 exposure to pollution in the Mediterranean mussels (*Mytilus galloprovincialis* L.) in the aegean coast of  
664 Turkey. *Bull Environ Contam Toxicol* 98:46-52. <https://doi.org/10.1007/s00128-016-1988-z>
- 665 Perkins TL, Clements K, Baas JH, Jago CF, Jones DL, Malham SK, McDonald JE (2014) Sediment  
666 composition influences spatial variation in the abundance of human pathogen indicator bacteria within  
667 an estuarine environment. *Plos One* 9: e112951. <https://doi.org/10.1371/journal.pone.0112951>
- 668 Plano LR, Shibata T, Garza AC et al (2013) Human-associated methicillin-resistant *Staphylococcus*  
669 *aureus* from a subtropical recreational marine beach. *Microb Ecol* 65:1039-1051.  
670 <https://doi.org/10.1007/s00248-013-0216-1>
- 671 Poharkar K, Doijad S, Kerkar S, Barbuddhe S (2017) Pathogenic bacteria of public health significance  
672 in estuarine mangrove ecosystem. In: Naik and Dubey (ed). *Mar Poll Microb Remed*. Springer,  
673 Sangapore, pp 239-253. [https://doi.org/10.1007/978-981-10-1044-6\\_15](https://doi.org/10.1007/978-981-10-1044-6_15)
- 674 Pomykała R, Michalski M, Józwick A, Osek, J (2012) Microbiological and marine biotoxins  
675 contamination of raw bivalve molluscs commercially available in Poland. *Bull Vet Inst Pulawy* 56: 563-  
676 568. <https://doi.org/10.2478/v10213-012-0099-9>
- 677 Regulation 854/2004/EC. Regulation (EC) No 854/2004 of the European Parliament and of the Council  
678 of 29 April 2004 laying down specific rules for the organization of official controls on products of animal  
679 origin intended for human consumption. *Official Journal of the European Union*, L 139 of 30 April 2004,  
680 L 226, 83–127
- 681 Rincé A, Balière C, Hervio-Heath D et al (2018) Occurrence of bacterial pathogens and human  
682 noroviruses in shellfish-harvesting areas and their catchments in France. *Front Microbiol* 9:2443.  
683 <https://doi.org/10.3389/fmicb.2018.02443>
- 684 Rodier J, Legube B, Merlet N (2009) *Water analysis*. Dunod, Paris (in French)
- 685 Sánchez-Vargas FM, Abu-El-Haija MA, Gómez-Duarte OG (2011) *Salmonella* infections: an update on  
686 epidemiology, management, and prevention. *Travel Med Infect Dis* 9:263-277.  
687 <https://doi.org/10.1016/j.tmaid.2011.11.001>
- 688 Santhiya G, Lakshumanan C, Selvin J, Asha D (2011) Microbiological analysis of seawater and  
689 sediments in urban shorelines: occurrence of heavy metals resistance bacteria on Chennai beaches, Bay  
690 of Bengal. *Microchem J* 99:197-202. <https://doi.org/10.1016/j.microc.2011.05.004>
- 691 Schets FM, van den Berg HH, Lynch G, de Rijk S, de Roda Husman AM, Schijven JF (2020) Evaluation  
692 of water quality guidelines for public swimming ponds. *Environ Int* 137: 105516.  
693 <https://doi.org/10.1016/j.envint.2020.105516>
- 694 Shoult DC, Ashbolt NJ (2018) Total staphylococci as performance surrogate for greywater treatment.  
695 *Environ Sci Pollut Res* 25: 32894-32900. <https://doi.org/10.1007/s11356-017-9050-1>

- 696 Soltani N, Amira A, Sifi K, Beldi H (2012) Environmental monitoring of the Annaba gulf (Algeria):  
697 measurement of biomarkers in *Donax trunculus* and metallic pollution. *Bull Soc zool Fr* 137:51-60
- 698 Stabili L, Acquaviva MI, Cavallo RA (2005) *Mytilus galloprovincialis* filter feeding on the bacterial  
699 community in a Mediterranean coastal area (Northern Ionian Sea, Italy). *Water Res* 39:469-477.  
700 <https://doi.org/10.1016/j.watres.2004.10.010>
- 701 Streeter K, Katouli M (2016) *Pseudomonas aeruginosa*: a review of their pathogenesis and prevalence  
702 in clinical settings and the environment. *Infect Epidemiol Med* 2:25–32.  
703 <https://doi.org/10.7508/iem.2016.01.008>
- 704 Telailia S (2014) Study of marine and coastal birds of Northeast Algeria: ecology and biology of  
705 reproduction and environmental impact on breeding species. Dissertation, University of El Tarf
- 706 Thapaliya D, Hellwig EJ, Kadariya J et al (2017) Prevalence and Characterization of *Staphylococcus*  
707 *aureus* and Methicillin-Resistant *Staphylococcus aureus* on Public Recreational Beaches in Northeast  
708 Ohio. *GeoHealth* 1: 320-332. <https://doi.org/10.1002/2017GH000106>
- 709 Tiefenthaler LL, Stein ED, Lyon GS (2009) Fecal indicator bacteria (FIB) levels during dry weather  
710 from Southern California reference streams. *Environ Monit Assess* 155:477-492. [https://doi.org/](https://doi.org/10.1007/s10661-008-0450-z)  
711 [10.1007/s10661-008-0450-z](https://doi.org/10.1007/s10661-008-0450-z)
- 712 Vezzulli L, Stagnaro L, Grande C, Tassistro G, Canesi L, Pruzzo C (2018) Comparative 16SrDNA gene-  
713 based microbiota profiles of the Pacific oyster (*Crassostrea gigas*) and the Mediterranean mussel  
714 (*Mytilus galloprovincialis*) from a shellfish farm (Ligurian Sea, Italy). *Microb Ecol* 75:495-504.  
715 [https://doi.org/ 10.1007/s00248-017-1051-6](https://doi.org/10.1007/s00248-017-1051-6).
- 716 Vincy MV, Brilliant R, Pradeepkumar AP (2017) Prevalence of indicator and pathogenic bacteria in a  
717 tropical river of Western Ghats, India. *Appl Water Sci* 7:833-844. [https://doi.org/10.1007/s13201-015-](https://doi.org/10.1007/s13201-015-0296-9)  
718 [0296-9](https://doi.org/10.1007/s13201-015-0296-9)
- 719 Walters E, Graml M, Behle C, Müller E, Horn H (2014) Influence of particle association and suspended  
720 solids on UV inactivation of fecal indicator bacteria in an urban river. *Water Air Soil Pollut* 225: 1822.  
721 <https://doi.org/10.1007/s11270-013-1822-8>
- 722 Wilkes G, Edge TA, Gannon VP et al (2011) Associations among pathogenic bacteria, parasites, and  
723 environmental and land use factors in multiple mixed-use watersheds. *Wat Res* 45: 5807-5825.  
724 <https://doi.org/10.1016/j.watres.2011.06.021>
- 725 Yaghoubzadeh Z, Kaboosi H, Ghadikolaii FP, Safari R, Fattahi E (2020) The half maximal inhibitory  
726 concentration (IC 50) effect of protein hydrolysates from rainbow trout (*Oncorhynchus mykiss*) skin on  
727 enterotoxin A gene expression in *Staphylococcus aureus*. *Int J Pept Res Ther* 1-8.  
728 <https://doi.org/10.1007/s10989-020-10036-4>



729 Yang SC, Lin CH, Aljuffali IA, Fang J (2017) Current pathogenic *Escherichia coli* foodborne outbreak  
730 cases and therapy development. *Arch Microbiol* 199: 811–825. [https://doi.org/10.1007/s00203-017-](https://doi.org/10.1007/s00203-017-1393-y)  
731 1393-y  
732 Zannella C, Mosca F, Mariani F et al (2017) Microbial diseases of bivalve mollusks: infections,  
733 immunology and antimicrobial defense. *Mar Drugs* 15:182. <https://doi.org/10.3390/md15060182>  
734 Zegmout M, Basraoui Y, Meziane M, Chahlaouia A, Demnati S, Chafi A (2011) Bacteriological  
735 pollution of the Saidia/Moulouya coastal zone (eastern region of Morocco). *Rev Microbiol Ind San*  
736 *Environn* 5: 71-85

737

738

739

740

741 **Figure legends:**

742

743 **Fig. 1** Map showing the location of the Gulf of Annaba and sampling sites

744 The location of the larger map is shown by a black rectangle on the insert map. The four sampling sites  
745 (S1 to S4) are indicated with black circles, S1: Cap de Garde, S2: Rezgui Rachid, S3: Sidi Salem, S4:  
746 Lahnaya.

747

748 **Fig. 2** Results of physicochemical analysis of seawater samples at the four sampling sites

749 **a** Temperature (°C), **b** Salinity (g/L), **c** Dissolved Oxygen (mg/L), **d** pH, **e** Suspended Solids (mg/L).  
750 S1: Cap de Garde, S2: Rezgui Rachid, S3: Sidi Salem, S4: Lahnaya.

751

752 **Fig. 3** Temporal variations of fecal indicator bacteria in seawater and mussels

753 **a** and **b** Total coliforms per 100 mL, **c** and **d** *Escherichia coli* per 100 mL, **e** and **f** Fecal streptococci per  
754 100 mL. Note that the scales are different on each diagram. S1: Cap de Garde, S2: Rezgui Rachid, S3:  
755 Sidi Salem, S4: Lahnaya.

756

757 **Fig. 4** Relative abundances of potential pathogenic bacteria in seawater (blue) and *Perna perna* (green)  
758 samples. (S1) Cap de Garde (S2) Rezgui Rachid, (S3) Sidi Salem, (S4) Lahnaya.

759

760 **Fig. 5** PCR amplification of the 16S rRNA gene

761 M: DNA ladder, lanes (EM18-MM6) represent amplified product (approx. 1500bp) of *E. coli* isolates.

762



763 **Fig. 6** Phylogeny of the 25 isolates with molecular identification

764 16S rRNA sequences from the 25 selected isolates together with the best hit from the GenBank database  
765 for each of the sequences, were compared in a Clustal X multiple sequence alignment (Kumar et al.  
766 2016). Accession numbers of the reference sequences are in parentheses and *Halobacterium* sp. A1T  
767 was used to root the tree.

768  
769 **Fig. 7** PCR amplification of seven genes of *E. coli* EM97

770 Lanes *trpA* to *putB* represent PCR products amplified from the EM97 isolate (*E. coli*). M: DNA ladder.

771

772 **Fig. 8** The *E. coli* strains isolated from S3 are similar but not identical

773 Phylogenetic tree showing the distances between the five analysed *E. coli* strains from S3, compared to  
774 *E. coli* strains from the NCBI database (accession numbers in parentheses). The tree was rooted using  
775 *Salmonella enterica*.

776

777 **Fig. 9** Principal component analysis (PCA) performed on data from seawater samples

778 **a** Correlation of environmental variables with the two first axes of the standard PCA. **b** Correlation of  
779 environmental variables with the first and third axes of the standard PCA. The main variables are  
780 indicated with solid arrows and supplemental variables are indicated with dotted arrows. DO: dissolved  
781 oxygen, Sal: salinity, T: water temperature, SS: Suspended solids. EC: *Escherichia coli*, TC: total  
782 coliforms and FS: fecal streptococci.

783

784 **Tables:**

785

786 **Table 1**, Primers used in this study

| Target gene | Primer name    | Sequence (5'-3')             | Reference                     |
|-------------|----------------|------------------------------|-------------------------------|
| 16S rRNA    | 27F            | AGAGTTTGATCCTGGCTCAG         | Lane 1991                     |
|             | 1492R          | CGGCTACCTTGTTACGACTT         |                               |
| <i>trpA</i> | <i>trpA</i> -F | ATGGAACGCTACGAATCTCTGTTTGCCC | Escobar-Páramo et al.<br>2003 |

|             |        |                           |                            |
|-------------|--------|---------------------------|----------------------------|
|             | trpA-R | TCGCCGCTTTCATCGGTTGTACAAA |                            |
| <i>trpB</i> | trpB-F | ACAATGACAAGACTTAACCCCT    | Escobar-Páramo et al. 2003 |
|             | trpB-R | TTTCCCCCTCGTGCTTCAAATATC  |                            |
| <i>polB</i> | polB-F | TGGAAAACTCAACGCCTGGT      | Bjedov et al. 2003         |
|             | polB-R | TGGTTGGCATCAGAAAACGGC     |                            |
| <i>icdA</i> | icdA-F | GAAAGTAAAGTAGTTGTTCCGG    | Escobar-Páramo et al. 2004 |
|             | icdA-R | GATGATCGCGTCACCAAAYTC     |                            |
| <i>putP</i> | putB-F | GCGACGATCCTTACACCTTTATTG  | Escobar-Páramo et al. 2003 |
|             | putB-R | CGCATCGGCCTCGGCAAAGCG     |                            |
| <i>dinB</i> | dinB-F | TTGAGAGGTGAGCAATGCGTA     | Bjedov et al. 2003         |
|             | dinB-R | GTATACATCATAATCCCAGCAC    |                            |
| <i>pabB</i> | pabB-F | TTTTACTCTCCGGCTATGCCGATCA | Guttman and Dykhuizen 1994 |
|             | pabB-R | GCTGCGGTTCCAGTTCGTCGATAAT |                            |

787

788 **Table 2,** Biochemical and molecular identification of 25 isolates isolated from *P. perna* mussels

| Isolate code | Api identification      | Best hit to 16S rRNA sequence | MLST identification     |
|--------------|-------------------------|-------------------------------|-------------------------|
| EM3          | <i>Escherichia coli</i> | <i>Escherichia coli</i>       | <i>Escherichia coli</i> |
| MM6          | <i>Escherichia coli</i> | <i>Escherichia coli</i>       | <i>Escherichia coli</i> |
| EM97         | <i>Escherichia coli</i> | <i>Escherichia coli</i>       | <i>Escherichia coli</i> |
| EM102        | <i>Escherichia coli</i> | <i>Escherichia coli</i>       | <i>Escherichia coli</i> |
| EM18         | <i>Escherichia coli</i> | <i>Escherichia coli</i>       | <i>Escherichia coli</i> |

|       |                                  |                               |    |
|-------|----------------------------------|-------------------------------|----|
| EM10  | <i>Escherichia coli</i>          | <i>Escherichia coli</i>       | NA |
| MM58  | <i>Escherichia coli</i>          | <i>Escherichia coli</i>       | NA |
| TCM7  | <i>Aeromonas hydrophila</i>      | <i>Proteus mirabilis</i>      | NA |
| MM59  | <i>Chromobacterium violaceum</i> | <i>Pseudomonas aeruginosa</i> | NA |
| SM25  | <i>Citrobacter koseri</i>        | <i>Enterobacter asburiae</i>  | NA |
| SM28  | <i>Enterobacter cloacea</i>      | <i>Enterobacter cloacea</i>   | NA |
| MM62  | <i>Klebsiella pneumoniae</i>     | <i>Klebsiella pneumoniae</i>  | NA |
| SM3   | <i>Morganella morganii</i>       | <i>Morganella morganii</i>    | NA |
| TCM19 | <i>Ochromobacter anthropi</i>    | <i>Morganella morganii</i>    | NA |
| IM14  | <i>Pseudomonas aeruginosa</i>    | <i>Pseudomonas aeruginosa</i> | NA |
| MM56  | <i>Pseudomonas fluorescens</i>   | <i>Pseudomonas parafulva</i>  | NA |
| IM27  | <i>Pseudomonas luteola</i>       | <i>Pseudomonas aeruginosa</i> | NA |
| MM2   | <i>Pseudomonas putida</i>        | <i>Pseudomonas aeruginosa</i> | NA |
| SM13  | <i>Proteus mirabilis</i>         | <i>Proteus mirabilis</i>      | NA |
| MM39  | <i>Salmonella choleraesuis</i>   | <i>Citrobacter freundii</i>   | NA |
| MM23  | <i>Salmonella spp</i>            | <i>Shewanella algae</i>       | NA |
| SM17  | <i>Serratia odorifera</i>        | <i>Enterobacter asburiae</i>  | NA |
| MM27  | <i>Shigella spp</i>              | <i>Shigella dysenteriae</i>   | NA |

|     |                                   |                                   |    |
|-----|-----------------------------------|-----------------------------------|----|
| BM2 | <i>Staphylococcus lentus</i>      | <i>Staphylococcus epidermidis</i> | NA |
| BM4 | <i>Staphylococcus epidermidis</i> | <i>Staphylococcus epidermidis</i> | NA |

789 NA: Not analysed

790 **Table 3**, Spearman's correlation matrix of the seawater quality variables in 2018

791

|                                         | <b>Temperat<br/>ure</b> | <b>Salinity</b> | <b>pH</b> | <b>Dissolved<br/>Oxygen</b> | <b>Suspende<br/>d Solids</b> | <b>Total<br/>Coliforms<br/>(TC)</b> | <b>Escherichi<br/>a coli (EC)</b> |
|-----------------------------------------|-------------------------|-----------------|-----------|-----------------------------|------------------------------|-------------------------------------|-----------------------------------|
| <b>Salinity</b>                         | 0.824***                |                 |           |                             |                              |                                     |                                   |
| <b>pH</b>                               | 0.181                   | 0.185           |           |                             |                              |                                     |                                   |
| <b>Dissolved<br/>Oxygen</b>             | -0.836***               | -0.650***       | 0.008     |                             |                              |                                     |                                   |
| <b>Suspende<br/>d Solids</b>            | -0.483***               | -0.529***       | -0.223    | 0.183                       |                              |                                     |                                   |
| <b>Total<br/>coliforms<br/>(TC)</b>     | 0.137                   | -0.021          | 0.183     | -0.371**                    | 0.565***                     |                                     |                                   |
| <b>Escherich<br/>ia coli<br/>(EC)</b>   | 0.285*                  | 0.140           | 0.025     | -0.459**                    | 0.507***                     | 0.769***                            |                                   |
| <b>Fecal<br/>Streptoco<br/>cci (FS)</b> | 0.643***                | 0.461***        | 0.119     | -0.721***                   | -0.025                       | 0.559***                            | 0.453***                          |

792 \* p≤0.05; \*\* p≤0.01; \*\*\* p≤ 0.001.

793

794

795 **SUPPLEMENTARY MATERIAL**

796

797 **Figure S1**, Sampling month and site projections.

798 **a** Sampling month projection on the two first axes of the standard PCA. **b** Sampling site projection on

799 the two first axes of the standard PCA.

800

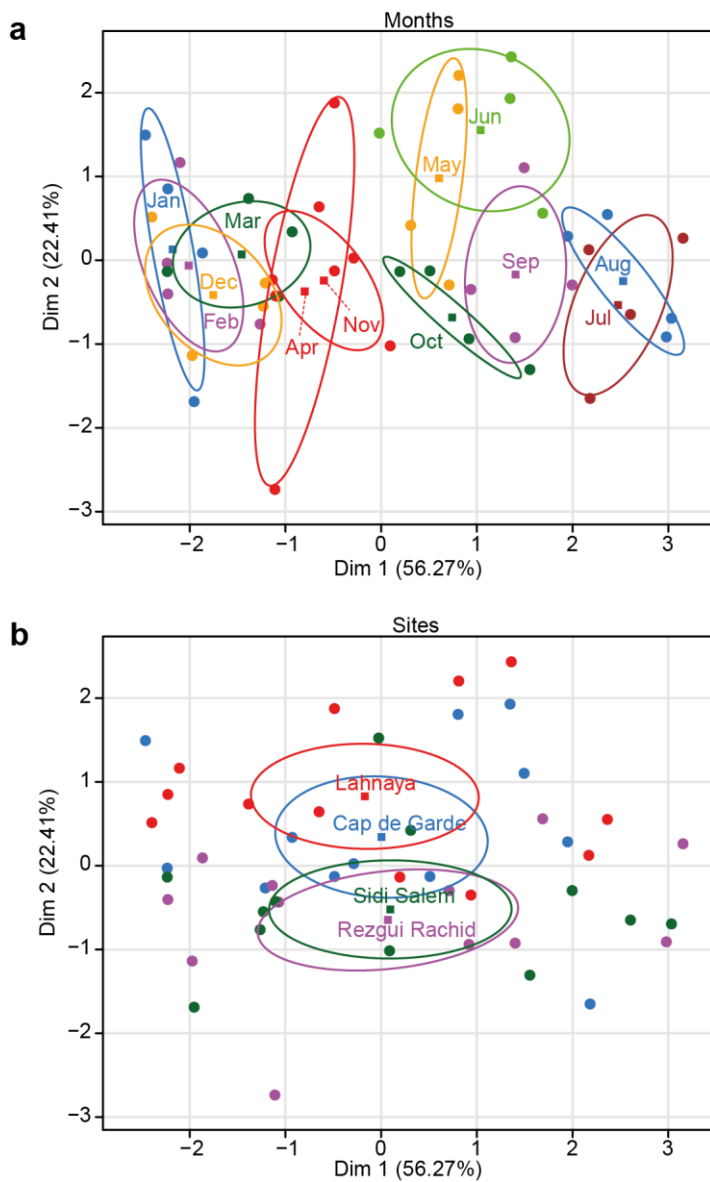

801

802

803

**Table S1**, Identification results of pathogenic bacteria in seawater and *Perna perna* mussels

| Species                                     | S1        |           | S2        |           | S3        |           | S4       |           | Total<br>W/M |
|---------------------------------------------|-----------|-----------|-----------|-----------|-----------|-----------|----------|-----------|--------------|
|                                             | W         | M         | W         | M         | W         | M         | W        | M         |              |
| <i>Aeromonas hydrophila</i>                 |           | 1         | 1         | 5         | 1         | 3         |          | 1         | 12           |
| <i>Burkholderia cepacia</i>                 |           |           | 1         |           | 1         | 1         | 1        | 1         | 5            |
| <i>Buttiauxella agresis</i>                 | 1         |           |           |           |           |           |          |           | 1            |
| <i>Citrobacter amalonaticus</i>             |           |           |           |           |           | 1         |          |           | 1            |
| <i>Citrobacter freundii</i>                 | 1         |           |           |           |           | 1         |          |           | 2            |
| <i>Enterobacter cloacae</i>                 | 2         | 1         |           |           | 1         | 1         |          | 1         | 6            |
| <i>Enterobacter sakazaki</i>                |           |           |           | 1         |           |           | 1        |           | 2            |
| <i>Escherichia coli</i>                     | 6         | 11        | 8         | 13        | 8         | 28        | 4        | 8         | 86           |
| <i>Klebsiella pneumoniae</i>                |           |           | 2         | 3         |           | 3         |          |           | 8            |
| <i>Klebsiella oxytoca</i>                   |           |           |           |           |           |           | 1        |           | 1            |
| <i>Kluyvera spp</i>                         |           | 1         |           |           |           |           |          |           | 1            |
| <i>Micrococcus spp</i>                      |           |           |           | 3         | 1         |           |          |           | 4            |
| <i>Morganella morganii</i>                  |           | 4         |           |           |           | 1         |          |           | 5            |
| <i>Ochromobacter anthropi</i>               |           |           | 1         |           |           |           |          | 1         | 2            |
| <i>Pasteurella pneumotropica</i>            |           |           |           |           | 1         |           |          |           | 1            |
| <i>Pantoea spp2</i>                         |           |           |           |           | 1         |           |          |           | 1            |
| <i>Proteus mirabilis</i>                    |           |           |           |           | 2         | 1         |          |           | 3            |
| <i>Proteus vulgaris</i>                     |           |           |           | 1         |           | 1         |          |           | 2            |
| <i>Providencia rettgeri</i>                 |           |           |           |           |           |           |          | 2         | 2            |
| <i>Pseudomonas aeruginosa</i>               |           | 1         |           | 1         | 1         | 4         |          |           | 7            |
| <i>Pseudomonas fluorescens</i>              |           |           |           | 1         | 1         |           |          |           | 2            |
| <i>Pseudomonas luteola</i>                  |           | 1         |           | 2         |           |           | 1        |           | 4            |
| <i>Pseudomonas putida</i>                   |           |           | 1         |           |           | 1         |          |           | 2            |
| <i>Salmonella choleraesuis spp arizonae</i> |           |           |           |           |           | 1         |          |           | 1            |
| <i>Salmonella spp</i>                       |           |           |           | 3         |           |           |          |           | 3            |
| <i>Serratia liquefaciens</i>                | 2         |           |           |           |           |           |          |           | 2            |
| <i>Serratia marcescens</i>                  |           |           |           |           | 1         |           |          |           | 1            |
| <i>Serratia odorifera</i>                   |           |           |           |           |           | 1         |          | 1         | 2            |
| <i>Serratia plymuthica</i>                  | 1         |           |           |           |           |           |          |           | 1            |
| <i>Shigella spp</i>                         |           | 1         |           | 2         |           |           |          |           | 3            |
| <i>Staphylococcus aureus</i>                |           |           |           | 1         | 1         |           |          |           | 2            |
| <i>Staphylococcus capitis</i>               |           |           |           | 1         |           |           |          |           | 1            |
| <i>Staphylococcus epidermidis</i>           |           |           |           | 2         |           |           |          |           | 2            |
| <i>Staphylococcus haemolyticus</i>          |           | 1         |           |           | 1         |           |          |           | 2            |
| <i>Staphylococcus hominis</i>               |           |           |           |           | 1         | 1         |          |           | 2            |
| <i>Staphylococcus lentus</i>                | 1         |           |           |           |           | 1         |          |           | 2            |
| <i>Staphylococcus lococcus</i>              |           |           |           | 1         |           |           |          |           | 1            |
| <i>Staphylococcus sciuri</i>                |           |           |           |           | 1         | 2         | 1        |           | 4            |
| <i>Staphylococcus xylosum</i>               |           |           | 1         | 1         | 1         | 1         |          |           | 4            |
| <i>Staphylococcus warneri</i>               |           |           |           | 1         |           |           |          |           | 1            |
| <i>Vibrio alginolyticus</i>                 |           |           |           |           | 2         |           |          |           | 2            |
| <i>Vibrio cholerae</i>                      |           |           |           |           |           | 1         |          |           | 1            |
| <i>Vibrio metschnikovii</i>                 |           | 1         |           |           |           |           |          |           | 1            |
| <i>Vibrio parahaemolyticus</i>              |           |           | 1         | 1         | 1         | 2         |          | 1         | 6            |
| <i>Vibrio vulnificus</i>                    |           | 1         |           |           |           |           |          |           | 1            |
| <i>Yersinia enterocolitica</i>              |           |           |           |           |           | 3         |          |           | 3            |
| <b>Total</b>                                | <b>14</b> | <b>24</b> | <b>16</b> | <b>43</b> | <b>27</b> | <b>59</b> | <b>9</b> | <b>16</b> | <b>208</b>   |

Table 1 (supplementary materiel): identification results of pathogenic bacteria in seawater and *Perna perna* mussels)

W: Seawater; M: Mussels Yellow background indicates the pathogenic bacteria from Figure 4

804

805
